# Supplementary material
Source: PubMed Central journal article supplement (PMC4291763)
Supplement: ja509150j_si_001.pdf [file ja509150j_si_001.pdf]

## **Supporting Information**

For

Mechanism of the Reduction of the Native Intermediate in the Multicopper Oxidases:  
Insights into Rapid Intramolecular Electron Transfer in Turnover

David E. Heppner, Christian H. Kjaergaard & Edward I. Solomon\*

*Department of Chemistry, Stanford University, Stanford California, 94305*

**Table S1** – Fit parameters used in modeling the 614 nm band with 50 electron equivalents (1.25 mM) H<sub>2</sub>Q. Graphical representations are featured in Figure 4. Rate constants in units of s<sup>-1</sup>.

| Fit                   | A           | B           | C           | D           |
|-----------------------|-------------|-------------|-------------|-------------|
| $k^{\text{red}}_1$    | 0.207       | 0.207       | 0.207       | 0.207       |
| $k^{\text{IET}}_1$    | 700         | 700         | 700         | 700         |
| $k^{\text{red}}_2$    | 0.207       | 0.400       | 0.207       | 0.400       |
| $k^{\text{IET}}_{+2}$ | <i>fast</i> | <i>fast</i> | 1000        | 1000        |
| $k^{\text{IET}}_{-2}$ | 0           | 0           | 1000        | 1000        |
| $k^{\text{red}}_3$    | 0.207       | 0.400       | 0.207       | 0.400       |
| $k^{\text{IET}}_3$    | <i>fast</i> | <i>fast</i> | <i>fast</i> | <i>fast</i> |
| $k^{\text{red}}_4$    | 0.207       | 0.400       | 0.207       | 0.400       |

**Table S2**– Fit parameters used in the global fit of the 614 nm band. Rate constants in units of s<sup>-1</sup>.

| [H <sub>2</sub> Q] mM    | 0.125  | 0.250  | 0.500  | 1.250 |
|--------------------------|--------|--------|--------|-------|
| $k^{\text{red}}_1$       | 0.0268 | 0.0475 | 0.0879 | 0.207 |
| $k^{\text{IET}}_1$       | 700    | 700    | 700    | 700   |
| $k^{\text{red}}_{2,3,4}$ | 0.0536 | 0.0800 | 0.160  | 0.400 |
| $k^{\text{IET}}_2$       | 1000   | 1000   | 1000   | 1000  |
| $k^{\text{IET}}_{-2}$    | 1000   | 1000   | 1000   | 1000  |
| $k^{\text{IET}}_3$       | 500    | 500    | 500    | 500   |

| [H <sub>2</sub> Q] mM    | 42.8 | 85.5 | 145  |
|--------------------------|------|------|------|
| $k_1^{\text{ox}*}$       | 52.0 | 56.0 | 65.0 |
| $k_1^{\text{red}}$       | 6.86 | 13.1 | 22.5 |
| $k_1^{\text{IET}}$       | 700  | 700  | 700  |
| $k_{2,3,4}^{\text{red}}$ | 13.7 | 30.0 | 50.0 |
| $k_2^{\text{IET}}$       | 1000 | 1000 | 1000 |
| $k_{-2}^{\text{IET}}$    | 1000 | 1000 | 1000 |
| $k_3^{\text{IET}}$       | 500  | 500  | 500  |

\*- Average of the NI formation rates gives a second order rate of  $1.2 \times 10^6 \text{ M}^{-1}\text{s}^{-1}$ .

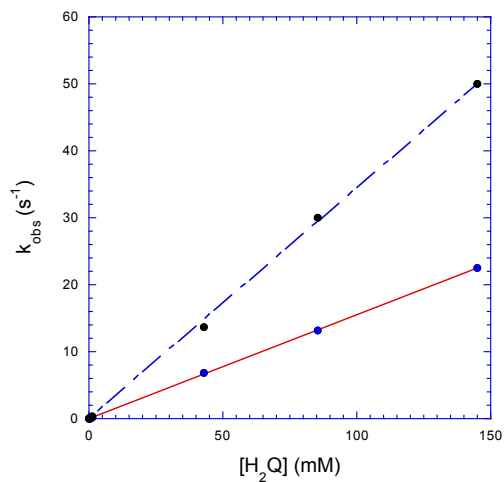

**Figure S1** – Plot of rate constants  $k_1^{\text{red}}$  (blue dots) and  $k_{2,3,4}^{\text{red}}$  (black dots) from 614 nm fits affording second order T1 rates of  $154.7 \text{ M}^{-1}\text{s}^{-1}$  and  $346.0 \text{ M}^{-1}\text{s}^{-1}$ , respectively.

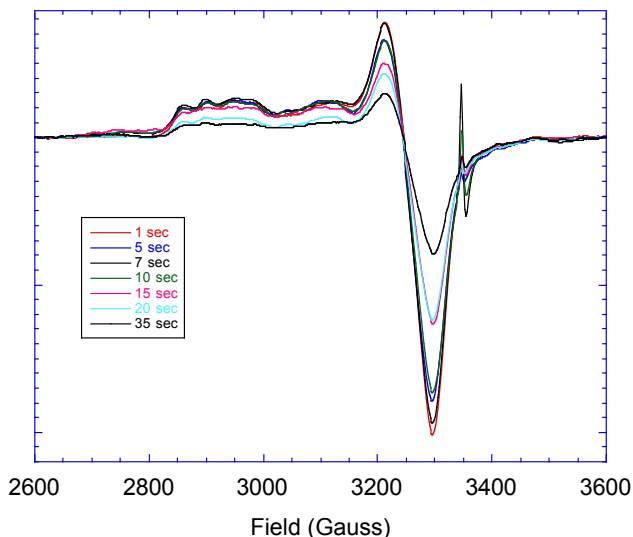

**Figure S2** – 77 K X-Band EPR spectra of the reduction of NI. Quench time given in figure legend. Radical attributed to  $\text{H}_2\text{Q}$ .

The overall integrated signal intensity of these spectra are scaled to the integrated intensity of NI at the same conditions. The quench times for the FQ-EPR time points were scaled slower by four since the  $\text{H}_2\text{Q}$  concentration is four times higher in the FQ-EPR reaction as it is in SF experiment and the rates of T1 reduction vary linearly with  $[\text{H}_2\text{Q}]$ . To estimate the relative contribution of the T1 and the 1-hole intermediate in the FQ-EPR spectra, the obtained Red NI spectra (Figure S2) were subtracted from an experimental T1 spectrum composed of 50/50 combination the 77 K X-band spectra of NI and met T2D, which best matches the  $A_{\parallel}$  hyperfine of the T1 signal in the intermediate. Since the exact spectrum of the 1-hole form is somewhat underdetermined, an average percentage of the T1 and 1-hole species was obtained by obtaining of the subtractions from matching the intensities of the top ( $\sim 3200$  G) and bottom ( $\sim 3300$  G) of the  $g_{\perp}$  region of the intermediate to obtain an integrated ratio of the T1 and intermediate.

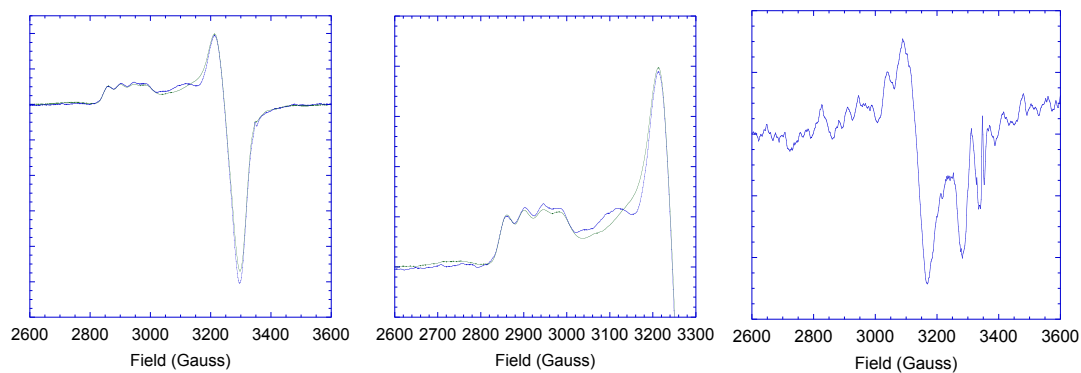

**Figure S3** – Example of FQ-EPR subtracted spectra (left) T1 (black) and 1sec Red NI (blue) FQ-EPR X-band spectra (middle), same as (left) but expanded to low field, (right) residual spectrum from the subtraction featuring intensity at  $g \approx 2.14$  (derivative) and  $g \approx 2.05$ .

**Table S3** – Percent compositions of Red NI X-band EPR signal.

| FQ Time (sec) | Percent T1 | Percent 1-hole |
|---------------|------------|----------------|
| 1             | 86.7%      | 6.4%           |
| 5             | 72.5%      | 15.7%          |
| 7             | 81.9%      | 9.2%           |
| 10            | 70.2%      | 18.2%          |
| 15            | 58.9%      | 15.9%          |
| 20            | 54.9%      | 9.3%           |
| 35            | 39.4%      | 14.5%          |

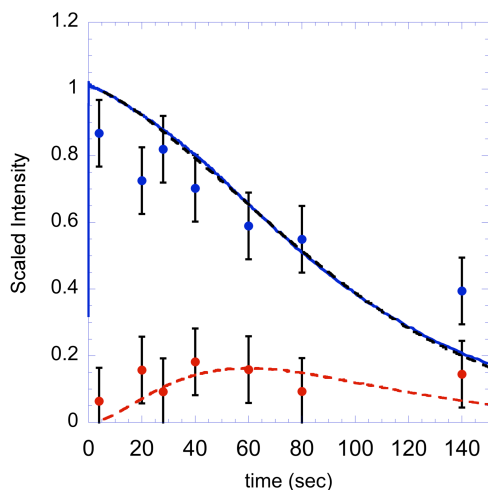

**Figure S4** – Correlation of spin-integrated speciation of T1 (blue dots) and 1-electron hole intermediate (red dots) with the SF absorption spectra. Correlation of the kinetics of the  $\pm 10\%$  error bars on spin integrated points. Quench times of FQ-EPR points are scaled slower by  $4\times$  due to the higher  $H_2Q$  concentration in the FQ-EPR compared to the SF conditions. Note the correlation of the T1 signal from EPR correlated with the 614 nm absorption. We attempt to estimate the time dependence of the 1-hole intermediate overtime, which is difficult due to its low concentration and large errors.

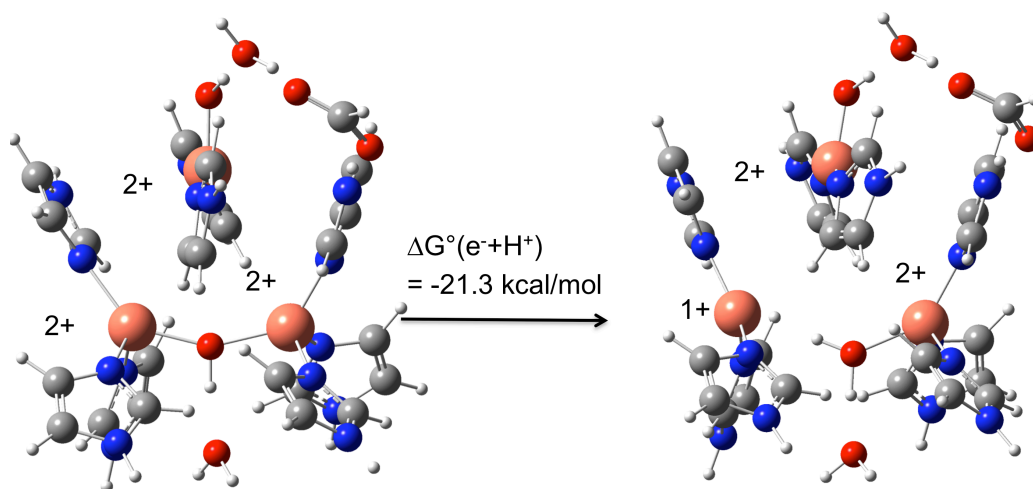

**Figure S5**– Optimized structures of EPT for Resting. Colors: Cu – orange, O – red, N – blue, C – gray, and H – white.

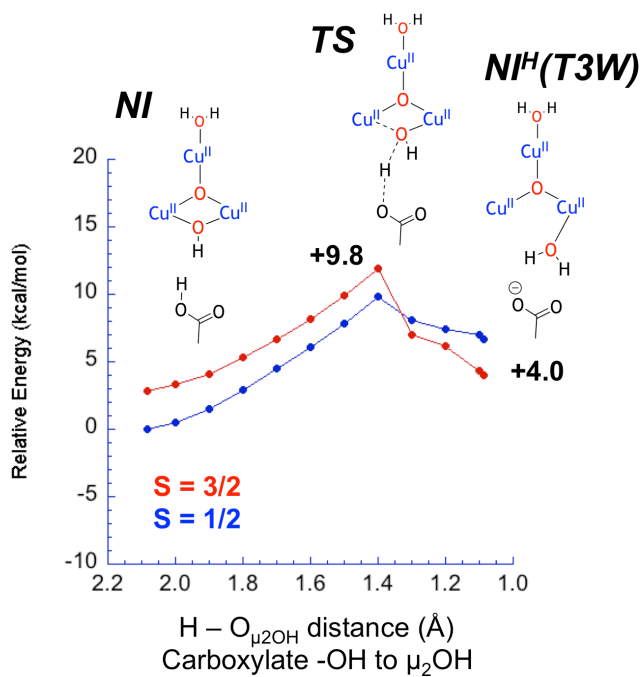

**Figure S6**– Potential energy surfaces of proton transfer from a carboxylate to the  $\mu_2$ -OH of NI (left) and from the T3b-OH<sub>2</sub> to the  $\mu_3$ -oxo of NI. Energies in blue and red correspond to  $S = 1/2$  and  $3/2$  spin states, respectively.

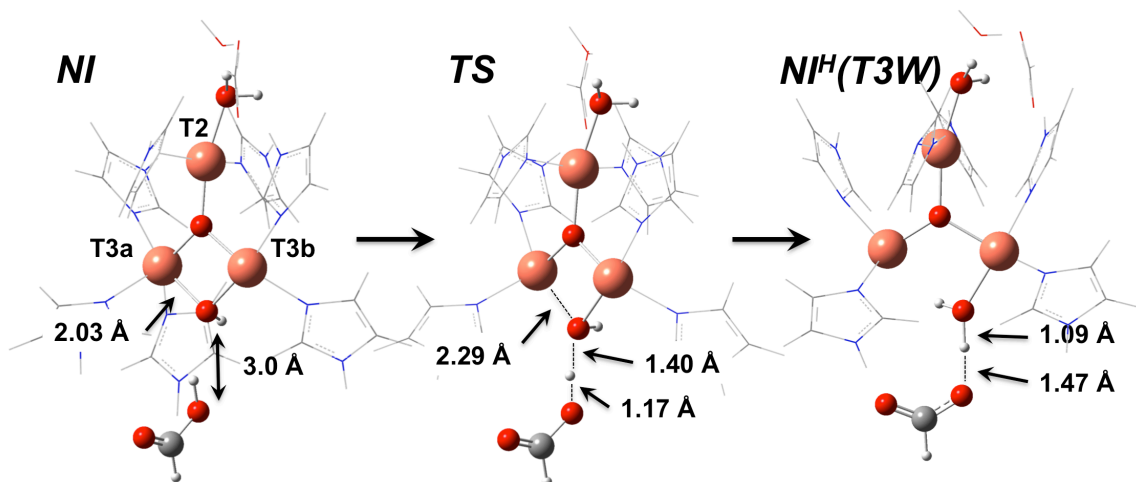

**Figure S7** – Optimized structures along the Proton Transfer coordinate from the carboxylate donor to the  $\mu_2$ -OH of NI. These structures are correlated to the energy surfaces in Figure S5. Some histidines omitted for clarity. Colors: Cu – orange, O – red, N – blue, C – gray, and H – white.

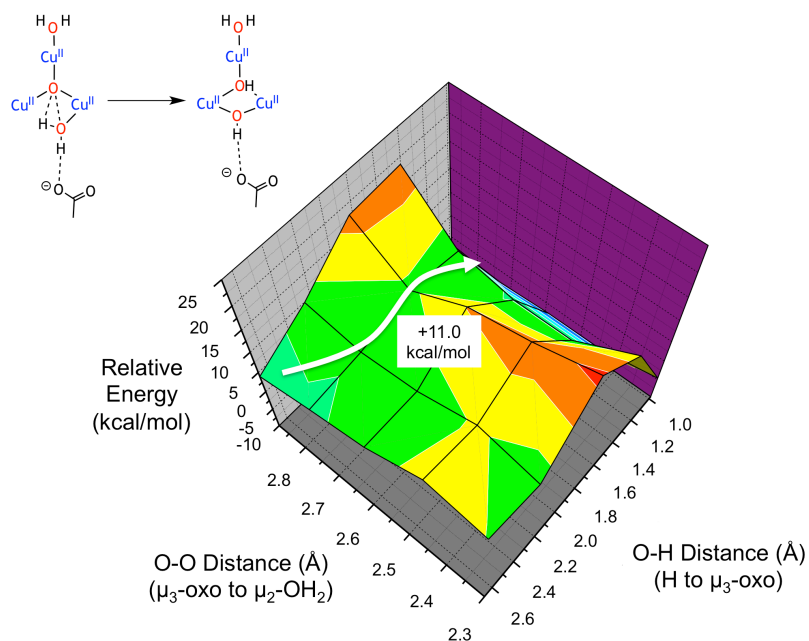

**Figure S8**– 2D potential energy surface for Proton Transfer from the  $\mu_2$ -OH<sub>2</sub> donor to the  $\mu_3$ -oxo of NI as a function of the donor-acceptor O-O distance and H-O<sub>oxo</sub> distance. The reaction starts at +4.0 kcal/mol proceeding through a TS at +11.0 kcal/mol and forms product with an energy of -7.7 kcal/mol. Structures along this path are presented in Figure S9.



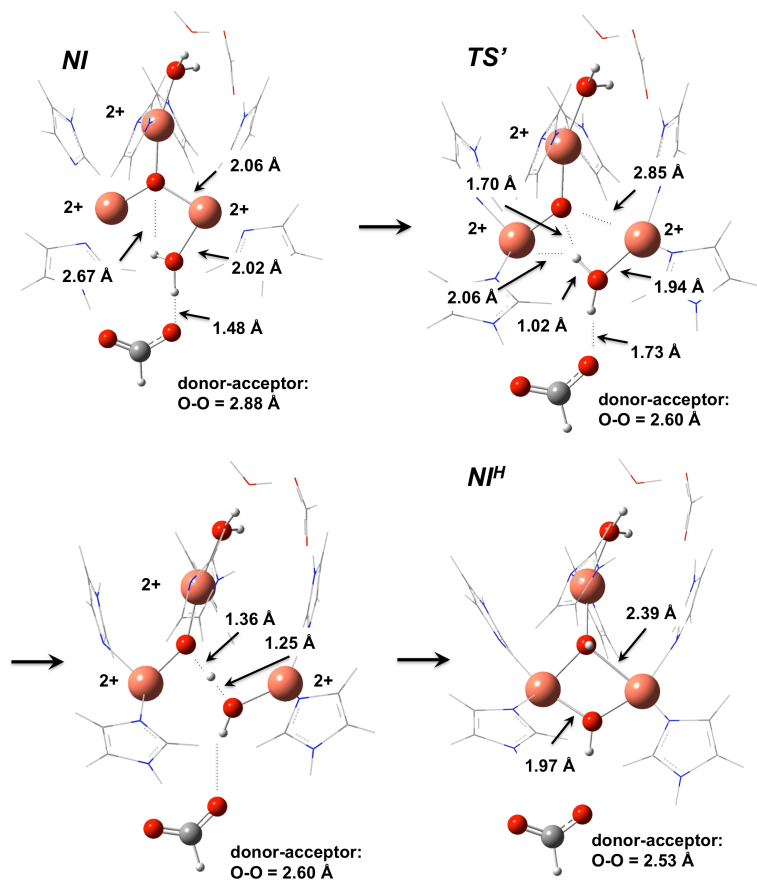

**Figure S9** – Optimized structures from the 2D proton transfer coordinate from the T3b-OH<sub>2</sub> to the μ<sub>3</sub>-oxo of NI. Colors: Cu – orange, O – red, N – blue, C – gray, and H – white.

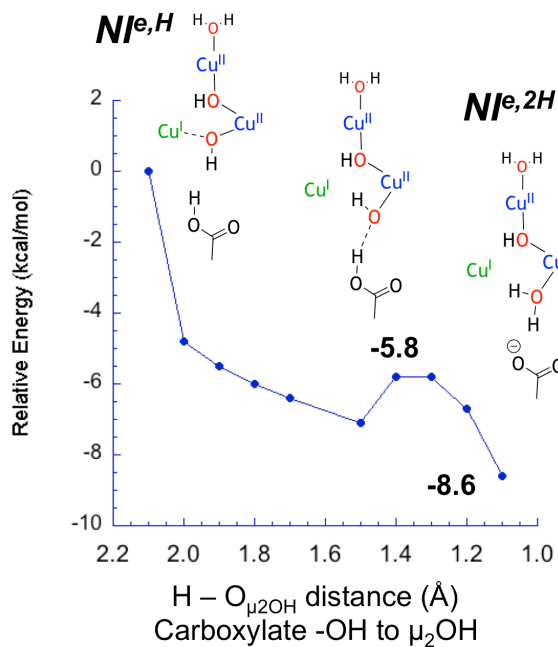

**Figure S10** – Potential energy surface of proton transfer from a carboxylate to the μ<sub>2</sub>-OH of **N1<sup>e,H</sup>**. The energy is of the S = 0 state. Structures in Figure S11.

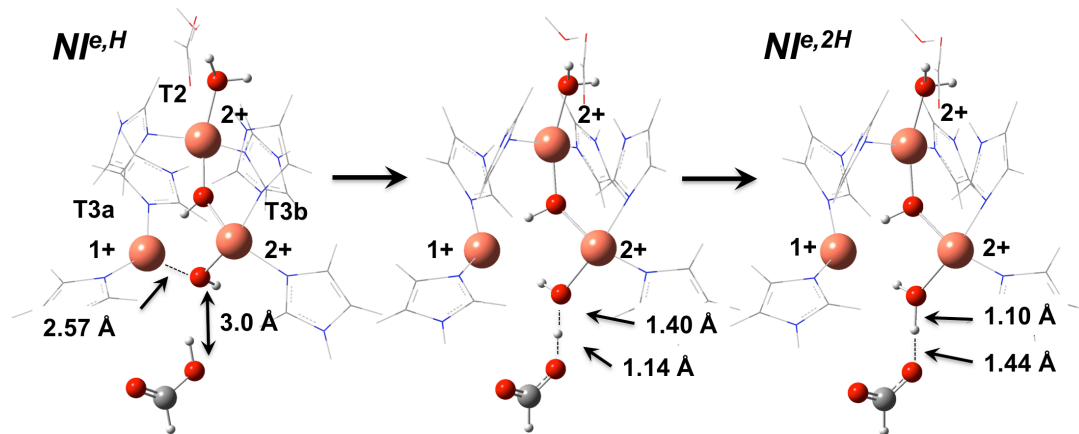

**Figure S11** – Optimized structures along the proton transfer coordinate from the carboxylate to the μ<sub>2</sub>-OH<sub>2</sub> of **N1<sup>e,H</sup>**. Colors: Cu – orange, O – red, N – blue, C – gray, and H – white.

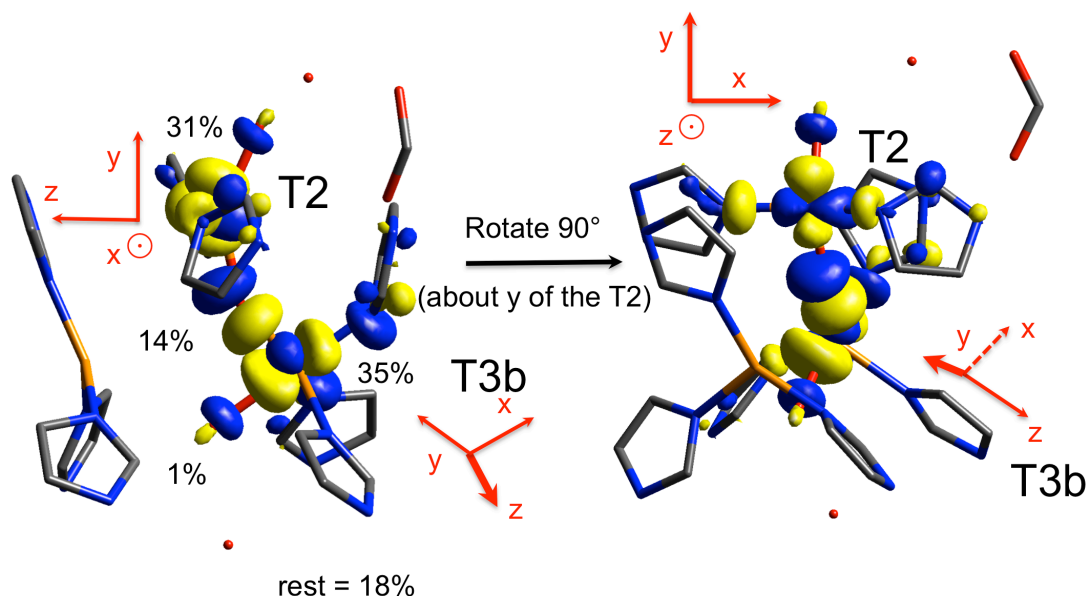

**Figure S12** –  $\beta$ -LUMO of  $\text{Ni}^{2e,2H}(\text{MV})$  (isodensity value = 0.035). The approximate g-tensor directions are given with axis in red where bold arrow indicates when the axis is directed out of the plane or dashed when directed into the plane.

Complete Gaussian 09 Citation:

Gaussian 09, Revision D.01, M. J. Frisch, G. W. Trucks, H. B. Schlegel, G. E. Scuseria, M. A. Robb, J. R. Cheeseman, G. Scalmani, V. Barone, B. Mennucci, G. A. Petersson, H. Nakatsuji, M. Caricato, X. Li, H. P. Hratchian, A. F. Izmaylov, J. Bloino, G. Zheng, J. L. Sonnenberg, M. Hada, M. Ehara, K. Toyota, R. Fukuda, J. Hasegawa, M. Ishida, T. Nakajima, Y. Honda, O. Kitao, H. Nakai, T. Vreven, J. A. Montgomery, Jr., J. E. Peralta, F. Ogliaro, M. Bearpark, J. J. Heyd, E. Brothers, K. N. Kudin, V. N. Staroverov, R. Kobayashi, J. Normand, K. Raghavachari, A. Rendell, J. C. Burant, S. S. Iyengar, J. Tomasi, M. Cossi, N. Rega, J. M. Millam, M. Klene, J. E. Knox, J. B. Cross, V. Bakken, C. Adamo, J. Jaramillo, R. Gomperts, R. E. Stratmann, O. Yazyev, A. J. Austin, R. Cammi, C. Pomelli, J. W. Ochterski, R. L. Martin, K. Morokuma, V. G. Zakrzewski, G. A. Voth, P. Salvador, J. J. Dannenberg, S. Dapprich, A. D. Daniels, Ö. Farkas, J. B. Foresman, J. V. Ortiz, J. Cioslowski, and D. J. Fox, Gaussian, Inc., Wallingford CT, 2009.

## XYZ Coordinates:

|    |          |          |          |
|----|----------|----------|----------|
| NI |          |          |          |
| Cu | -1.54858 | 0.81540  | 0.94698  |
| Cu | -0.36923 | -1.24178 | -0.86063 |
| Cu | 1.68810  | 1.45040  | -0.14380 |
| O  | 0.11047  | 0.44514  | 0.05440  |
| O  | -1.86815 | -0.96218 | 0.26929  |
| C  | 2.27840  | -0.81589 | 3.03405  |
| N  | 3.58984  | -0.66252 | 2.60366  |
| C  | 1.55654  | 0.15992  | 2.41738  |
| C  | 3.62719  | 0.37194  | 1.72921  |
| N  | 2.39786  | 0.88620  | 1.58874  |
| H  | 0.50227  | 0.35190  | 2.46241  |
| H  | 4.51199  | 0.71871  | 1.20966  |
| C  | -0.39963 | 3.85865  | 2.07483  |
| N  | -1.07502 | 2.95769  | 1.24570  |
| C  | -0.35027 | 5.09571  | 1.50381  |
| C  | -1.42524 | 3.67568  | 0.17899  |
| N  | -1.00412 | 4.96446  | 0.30108  |
| H  | 0.07128  | 6.02264  | 1.85481  |
| H  | -1.94356 | 3.31131  | -0.68876 |
| C  | -2.80569 | -0.66502 | 5.05260  |
| N  | -2.62961 | -1.78228 | 4.24171  |
| C  | -2.48183 | 0.41653  | 4.26535  |
| C  | -2.21478 | -1.34414 | 3.01723  |
| N  | -2.11556 | -0.01576 | 2.99641  |
| H  | -2.48724 | 1.46349  | 4.52746  |
| H  | -2.00059 | -1.97630 | 2.17338  |
| C  | -0.01315 | -4.66358 | 1.79725  |
| N  | -0.36931 | -5.49600 | 0.74439  |
| C  | 0.06294  | -3.40035 | 1.27583  |
| C  | -0.49141 | -4.69826 | -0.37222 |
| N  | -0.23917 | -3.42818 | -0.07475 |
| H  | 0.31215  | -2.47877 | 1.77547  |
| H  | -0.75270 | -5.07650 | -1.35038 |
| C  | -0.71672 | 2.68334  | -3.17720 |
| N  | -0.01739 | 3.86481  | -2.99245 |
| C  | -0.12982 | 1.75874  | -2.37233 |
| C  | 0.97018  | 3.62411  | -2.08329 |
| N  | 0.90728  | 2.35555  | -1.68771 |
| H  | -0.39557 | 0.73407  | -2.21706 |
| H  | 1.67958  | 4.36019  | -1.73348 |
| C  | 3.43331  | -0.69887 | -2.43423 |
| N  | 3.64927  | -1.42072 | -1.27807 |
| C  | 2.07363  | -0.70443 | -2.64692 |
| C  | 2.44424  | -1.83293 | -0.81627 |

|   |          |          |          |
|---|----------|----------|----------|
| N | 1.46366  | -1.41085 | -1.61925 |
| H | 1.50395  | -0.25653 | -3.44507 |
| H | 2.31292  | -2.40176 | 0.09009  |
| C | -2.18461 | -2.58109 | -4.68019 |
| N | -3.25483 | -2.21965 | -3.86998 |
| C | -1.06183 | -2.28364 | -3.93581 |
| C | -2.76882 | -1.73606 | -2.69527 |
| N | -1.43833 | -1.75584 | -2.70098 |
| H | -0.02301 | -2.41791 | -4.19436 |
| H | -3.40758 | -1.48857 | -1.86286 |
| C | -5.16690 | 1.30728  | -1.27280 |
| N | -5.77561 | 0.83707  | -0.11729 |
| C | -3.86317 | 1.55395  | -0.94458 |
| C | -4.81350 | 0.84165  | 0.87326  |
| N | -3.64715 | 1.26304  | 0.39289  |
| H | -3.07037 | 1.89295  | -1.59116 |
| H | -4.99800 | 0.53820  | 1.89403  |
| C | 6.66174  | -1.54033 | 0.63861  |
| O | 5.44058  | -1.89599 | 0.52738  |
| O | 7.20233  | -0.45288 | 0.22605  |
| O | 3.45265  | 2.25081  | -0.73155 |
| O | 5.72007  | 1.53611  | -0.03692 |
| H | 3.42829  | 2.28429  | -1.71030 |
| H | 6.17605  | 2.23588  | 0.50501  |
| H | 6.33881  | 0.64136  | -0.04184 |
| H | 4.41688  | 1.91127  | -0.47558 |
| H | -2.79636 | -1.25378 | 0.10145  |
| H | 7.31697  | -2.25454 | 1.15783  |
| H | 1.96074  | -1.63897 | 3.62329  |
| H | 0.02493  | 3.70461  | 3.03368  |
| H | -3.13187 | -0.75930 | 6.07314  |
| H | 0.14897  | -5.00584 | 2.79485  |
| H | -1.56761 | 2.58056  | -3.79957 |
| H | 4.26072  | -0.24591 | -2.93820 |
| H | -2.35722 | -3.01659 | -5.65986 |
| H | -5.69825 | 1.46090  | -2.18610 |
| H | -2.78359 | -2.77218 | 4.52441  |
| H | -0.48972 | -6.53469 | 0.81540  |
| H | -4.25235 | -2.28959 | -4.10935 |
| H | 4.55591  | -1.54134 | -0.73551 |
| H | -6.78160 | 0.53353  | -0.07810 |
| H | -1.12997 | 5.74009  | -0.34218 |
| H | -0.21050 | 4.73793  | -3.50160 |
| H | 4.37626  | -1.29063 | 2.83880  |
| O | -4.29942 | -1.98971 | -0.11899 |
| H | -5.16568 | -1.58608 | 0.17371  |

|     |          |          |          |
|-----|----------|----------|----------|
| H   | -4.27934 | -2.94141 | 0.19891  |
| Nle |          |          |          |
| Cu  | -1.74631 | 1.00903  | 1.18332  |
| Cu  | -0.29745 | -1.21609 | -0.82242 |
| Cu  | 1.38450  | 1.51911  | -0.11393 |
| O   | -0.13765 | 0.40056  | 0.19733  |
| O   | -1.83719 | -1.92659 | 0.04789  |
| C   | 2.36337  | -0.53932 | 3.01941  |
| N   | 3.65934  | -0.30643 | 2.57448  |
| C   | 1.55473  | 0.36352  | 2.40817  |
| C   | 3.59411  | 0.73443  | 1.69684  |
| N   | 2.32551  | 1.14455  | 1.56829  |
| H   | 0.48198  | 0.44712  | 2.41668  |
| H   | 4.43293  | 1.14185  | 1.16376  |
| C   | -0.67372 | 3.96367  | 1.81844  |
| N   | -1.57929 | 3.09127  | 1.23053  |
| C   | -0.52575 | 5.10011  | 1.08027  |
| C   | -1.99786 | 3.72035  | 0.13585  |
| N   | -1.37723 | 4.92982  | 0.01214  |
| H   | 0.07517  | 5.98135  | 1.22902  |
| H   | -2.72295 | 3.34818  | -0.56702 |
| C   | -2.74040 | -0.63311 | 4.96878  |
| N   | -2.47574 | -1.77033 | 4.21037  |
| C   | -2.49000 | 0.43454  | 4.14309  |
| C   | -2.07496 | -1.34965 | 2.96422  |
| N   | -2.07770 | -0.01858 | 2.89616  |
| H   | -2.57608 | 1.48839  | 4.35906  |
| H   | -1.82622 | -1.97966 | 2.11930  |
| C   | 0.48292  | -4.61555 | 1.92400  |
| N   | 0.22093  | -5.54370 | 0.92447  |
| C   | 0.65998  | -3.41995 | 1.27523  |
| C   | 0.25822  | -4.87521 | -0.27498 |
| N   | 0.51655  | -3.59022 | -0.09209 |
| H   | 0.84028  | -2.44567 | 1.70248  |
| H   | 0.09098  | -5.35803 | -1.22753 |
| C   | -0.89753 | 2.46332  | -3.31094 |
| N   | -0.25583 | 3.68547  | -3.20923 |
| C   | -0.41115 | 1.68421  | -2.31211 |
| C   | 0.60994  | 3.60673  | -2.15409 |
| N   | 0.51569  | 2.40501  | -1.59564 |
| H   | -0.65778 | 0.67700  | -2.04860 |
| H   | 1.26012  | 4.40423  | -1.82780 |
| C   | 3.54818  | -0.51039 | -2.39833 |
| N   | 3.77205  | -1.08296 | -1.15792 |
| C   | 2.18395  | -0.51184 | -2.58827 |

|   |          |          |          |
|---|----------|----------|----------|
| C | 2.56540  | -1.40916 | -0.63976 |
| N | 1.57878  | -1.07532 | -1.47560 |
| H | 1.60577  | -0.15269 | -3.42517 |
| H | 2.44171  | -1.87775 | 0.31961  |
| C | -1.88729 | -2.98167 | -4.65843 |
| N | -2.98574 | -2.62977 | -3.87781 |
| C | -0.79021 | -2.53800 | -3.94969 |
| C | -2.52906 | -2.00929 | -2.75218 |
| N | -1.20031 | -1.93508 | -2.76361 |
| H | 0.25539  | -2.61844 | -4.20396 |
| H | -3.15845 | -1.66467 | -1.94695 |
| C | -5.14667 | 0.83132  | -1.47371 |
| N | -5.75344 | 0.40388  | -0.29829 |
| C | -3.84631 | 1.11337  | -1.14243 |
| C | -4.79651 | 0.44012  | 0.68673  |
| N | -3.63341 | 0.87573  | 0.21078  |
| H | -3.05398 | 1.46464  | -1.78113 |
| H | -4.97950 | 0.14184  | 1.70424  |
| C | 6.71897  | -1.18066 | 0.69749  |
| O | 6.00754  | -1.87444 | -0.10005 |
| O | 6.62510  | 0.07184  | 0.96301  |
| O | 3.13573  | 2.41971  | -0.86237 |
| O | 5.54503  | 1.98211  | -0.30249 |
| H | 3.07298  | 2.32895  | -1.83442 |
| H | 5.91555  | 2.77038  | 0.23991  |
| H | 5.98543  | 1.11138  | 0.10022  |
| H | 4.12106  | 2.18051  | -0.63017 |
| H | -1.75171 | -2.87352 | -0.19098 |
| H | 7.50999  | -1.73375 | 1.23533  |
| H | 2.09852  | -1.35055 | 3.62646  |
| H | -0.18385 | 3.81180  | 2.73777  |
| H | -3.06750 | -0.68739 | 5.98942  |
| H | 0.52486  | -4.87096 | 2.96662  |
| H | -1.62445 | 2.22271  | -4.03657 |
| H | 4.37049  | -0.15517 | -2.98438 |
| H | -2.01810 | -3.50561 | -5.60015 |
| H | -5.68798 | 0.91443  | -2.39491 |
| H | -2.56874 | -2.75137 | 4.55320  |
| H | 0.01114  | -6.54213 | 1.06745  |
| H | -3.97403 | -2.82678 | -4.10430 |
| H | 4.72750  | -1.30948 | -0.71176 |
| H | -6.72945 | 0.02916  | -0.24808 |
| H | -1.43611 | 5.58322  | -0.75042 |
| H | -0.41792 | 4.47933  | -3.84505 |
| H | 4.49360  | -0.88240 | 2.84164  |
| O | -4.36924 | -2.29367 | 0.75693  |

|   |          |          |         |
|---|----------|----------|---------|
| H | -4.22513 | -2.57657 | 1.70588 |
| H | -3.43682 | -2.02377 | 0.43654 |

NIH (T3W)

|    |          |          |          |
|----|----------|----------|----------|
| Cu | -1.65695 | 0.92428  | 1.13173  |
| Cu | -0.33597 | -1.26733 | -0.88652 |
| Cu | 1.53878  | 1.46442  | -0.13673 |
| O  | -0.14894 | 0.39875  | 0.16336  |
| O  | -2.01448 | -1.79719 | 0.17129  |
| C  | 2.37506  | -0.62591 | 3.05113  |
| N  | 3.66695  | -0.47251 | 2.57874  |
| C  | 1.60426  | 0.29081  | 2.41783  |
| C  | 3.64878  | 0.51911  | 1.65271  |
| N  | 2.39550  | 0.98867  | 1.52657  |
| H  | 0.54637  | 0.44900  | 2.49747  |
| H  | 4.50847  | 0.86711  | 1.09004  |
| C  | -0.40006 | 4.01494  | 1.89068  |
| N  | -1.29064 | 3.15681  | 1.25373  |
| C  | -0.23852 | 5.16761  | 1.18190  |
| C  | -1.67574 | 3.81304  | 0.15990  |
| N  | -1.05487 | 5.02116  | 0.08448  |
| H  | 0.34676  | 6.05090  | 1.37630  |
| H  | -2.38125 | 3.46645  | -0.57606 |
| C  | -2.74083 | -0.42732 | 5.04380  |
| N  | -2.53415 | -1.58720 | 4.30160  |
| C  | -2.49083 | 0.61116  | 4.17135  |
| C  | -2.17089 | -1.23554 | 3.04429  |
| N  | -2.13527 | 0.09462  | 2.92244  |
| H  | -2.53450 | 1.67454  | 4.35151  |
| H  | -1.94961 | -1.93026 | 2.25734  |
| C  | 0.19507  | -4.55897 | 1.98754  |
| N  | -0.13734 | -5.44792 | 0.97627  |
| C  | 0.33548  | -3.33699 | 1.38923  |
| C  | -0.17791 | -4.73600 | -0.19612 |
| N  | 0.09638  | -3.45046 | 0.02595  |
| H  | 0.59456  | -2.39284 | 1.84041  |
| H  | -0.40139 | -5.17727 | -1.15777 |
| C  | -0.76128 | 2.57726  | -3.25181 |
| N  | -0.06338 | 3.76163  | -3.12776 |
| C  | -0.27369 | 1.72955  | -2.31550 |
| C  | 0.83496  | 3.60313  | -2.11245 |
| N  | 0.70605  | 2.37785  | -1.60343 |
| H  | -0.55545 | 0.71644  | -2.12078 |
| H  | 1.53126  | 4.35702  | -1.77486 |
| C  | 3.49477  | -0.67414 | -2.40718 |
| N  | 3.71208  | -1.31591 | -1.20727 |



|   |          |          |          |
|---|----------|----------|----------|
| C | 2.13193  | -0.62648 | -2.59210 |
| C | 2.50935  | -1.63869 | -0.68497 |
| N | 1.52312  | -1.23055 | -1.49771 |
| H | 1.56090  | -0.21223 | -3.40802 |
| H | 2.38408  | -2.15218 | 0.25324  |
| C | -2.07722 | -2.79625 | -4.57367 |
| N | -3.15159 | -2.37585 | -3.79881 |
| C | -0.95558 | -2.43373 | -3.85637 |
| C | -2.67423 | -1.78743 | -2.67748 |
| N | -1.34068 | -1.80830 | -2.66839 |
| H | 0.08476  | -2.58087 | -4.10257 |
| H | -3.32367 | -1.43470 | -1.89965 |
| C | -5.08118 | 1.12465  | -1.35651 |
| N | -5.68476 | 0.69031  | -0.17866 |
| C | -3.75684 | 1.30383  | -1.05622 |
| C | -4.71505 | 0.64815  | 0.79491  |
| N | -3.53459 | 1.00166  | 0.28580  |
| H | -2.95780 | 1.62603  | -1.70332 |
| H | -4.89645 | 0.36047  | 1.82079  |
| C | 6.73510  | -1.44379 | 0.63681  |
| O | 5.58168  | -1.95003 | 0.42220  |
| O | 7.16439  | -0.29607 | 0.26085  |
| O | 3.27592  | 2.19688  | -0.84843 |
| O | 5.59962  | 1.56693  | -0.27339 |
| H | 3.20954  | 2.21725  | -1.82594 |
| H | 6.06460  | 2.35394  | 0.12432  |
| H | 6.25240  | 0.69737  | -0.16208 |
| H | 4.26291  | 1.86823  | -0.63784 |
| H | -3.02479 | -1.77656 | 0.03022  |
| H | 7.42784  | -2.07329 | 1.22042  |
| H | 2.07003  | -1.41166 | 3.67058  |
| H | 0.05965  | 3.87040  | 2.82864  |
| H | -3.02755 | -0.48329 | 6.09103  |
| H | 0.30177  | -4.83859 | 3.01199  |
| H | -1.53501 | 2.39443  | -3.93691 |
| H | 4.33320  | -0.30733 | -2.95784 |
| H | -2.25280 | -3.29648 | -5.52104 |
| H | -5.64541 | 1.29849  | -2.25733 |
| H | -2.65579 | -2.56348 | 4.64035  |
| H | -0.32009 | -6.47085 | 1.11132  |
| H | -4.15322 | -2.52116 | -4.00077 |
| H | 4.65219  | -1.49150 | -0.69665 |
| H | -6.71073 | 0.46014  | -0.10353 |
| H | -1.13162 | 5.72357  | -0.63826 |
| H | -0.20661 | 4.58174  | -3.74823 |
| H | 4.47843  | -1.06898 | 2.86198  |

|   |          |          |          |
|---|----------|----------|----------|
| O | -4.48745 | -2.14999 | -0.13783 |
| H | -5.28951 | -1.57573 | -0.28982 |
| H | -4.76416 | -3.11375 | -0.16920 |
| H | -1.80715 | -2.75442 | 0.23513  |

NIH

|    |          |          |          |
|----|----------|----------|----------|
| Cu | -1.64197 | 0.92727  | 0.91706  |
| Cu | -0.42089 | -1.56368 | -0.91669 |
| Cu | 1.77578  | 1.60715  | -0.14369 |
| O  | 0.23720  | 0.48852  | 0.20264  |
| O  | -1.81577 | -0.85044 | 0.14583  |
| C  | 2.36041  | -0.61100 | 3.07886  |
| N  | 3.64759  | -0.53198 | 2.57007  |
| C  | 1.67892  | 0.44713  | 2.54574  |
| C  | 3.70733  | 0.51297  | 1.71095  |
| N  | 2.51365  | 1.12279  | 1.64987  |
| H  | 0.67039  | 0.76913  | 2.74998  |
| H  | 4.58193  | 0.80165  | 1.13448  |
| C  | -0.32471 | 3.94794  | 1.81024  |
| N  | -1.13409 | 3.04918  | 1.09430  |
| C  | -0.21946 | 5.12931  | 1.13752  |
| C  | -1.51089 | 3.72579  | 0.00509  |
| N  | -0.97128 | 4.97253  | -0.00218 |
| H  | 0.29446  | 6.04167  | 1.39173  |
| H  | -2.15033 | 3.36491  | -0.77985 |
| C  | -2.70805 | -0.33811 | 5.09677  |
| N  | -2.56968 | -1.50751 | 4.35481  |
| C  | -2.39722 | 0.68275  | 4.22369  |
| C  | -2.19524 | -1.16584 | 3.09032  |
| N  | -2.07727 | 0.15657  | 2.97361  |
| H  | -2.38290 | 1.74585  | 4.40961  |
| H  | -2.03200 | -1.87363 | 2.29569  |
| C  | -0.01235 | -4.55539 | 2.05421  |
| N  | -0.40499 | -5.43324 | 1.05478  |
| C  | 0.06641  | -3.31815 | 1.48003  |
| C  | -0.55269 | -4.69106 | -0.09379 |
| N  | -0.27797 | -3.40580 | 0.14342  |
| H  | 0.33938  | -2.38565 | 1.94516  |
| H  | -0.84492 | -5.10647 | -1.04812 |
| C  | -0.79206 | 2.49648  | -3.26843 |
| N  | -0.06411 | 3.67685  | -3.20674 |
| C  | -0.23650 | 1.66709  | -2.33328 |
| C  | 0.89757  | 3.53602  | -2.25435 |
| N  | 0.80780  | 2.32590  | -1.70296 |
| H  | -0.51555 | 0.66248  | -2.08316 |
| H  | 1.61570  | 4.29950  | -1.98881 |

|   |          |          |          |
|---|----------|----------|----------|
| C | 3.37723  | -0.89977 | -2.47875 |
| N | 3.61525  | -1.55625 | -1.28646 |
| C | 2.01215  | -0.93387 | -2.66918 |
| C | 2.42914  | -1.96742 | -0.78373 |
| N | 1.42836  | -1.60367 | -1.59746 |
| H | 1.42085  | -0.53662 | -3.47904 |
| H | 2.32970  | -2.52221 | 0.13659  |
| C | -2.29790 | -2.83383 | -4.51309 |
| N | -3.34294 | -2.39853 | -3.70738 |
| C | -1.15118 | -2.49013 | -3.83442 |
| C | -2.82570 | -1.82232 | -2.59513 |
| N | -1.49371 | -1.85783 | -2.64021 |
| H | -0.12174 | -2.65505 | -4.11215 |
| H | -3.42274 | -1.49069 | -1.76439 |
| C | -5.16304 | 1.24991  | -1.28784 |
| N | -5.74589 | 0.85314  | -0.09060 |
| C | -3.84502 | 1.47986  | -1.01965 |
| C | -4.75964 | 0.88673  | 0.87041  |
| N | -3.59931 | 1.25393  | 0.32619  |
| H | -3.06627 | 1.76499  | -1.70708 |
| H | -4.91407 | 0.63927  | 1.91092  |
| C | 6.63899  | -1.58293 | 0.60562  |
| O | 5.40670  | -1.91873 | 0.57683  |
| O | 7.16198  | -0.52142 | 0.10346  |
| O | 3.47128  | 2.23621  | -0.88101 |
| O | 5.69421  | 1.44969  | -0.20848 |
| H | 3.41021  | 2.25303  | -1.86016 |
| H | 6.22209  | 2.19699  | 0.18667  |
| H | 6.31499  | 0.52638  | -0.19076 |
| H | 4.45444  | 1.85252  | -0.63657 |
| H | -2.70992 | -1.28223 | 0.20655  |
| H | 7.32375  | -2.27620 | 1.12112  |
| H | 2.02481  | -1.45068 | 3.64814  |
| H | 0.13147  | 3.86827  | 2.76995  |
| H | -3.00824 | -0.36565 | 6.13838  |
| H | 0.16288  | -4.84133 | 3.06324  |
| H | -1.60969 | 2.34688  | -3.94916 |
| H | 4.20599  | -0.48725 | -3.02991 |
| H | -2.49308 | -3.34421 | -5.44700 |
| H | -5.71808 | 1.37458  | -2.18983 |
| H | -2.71156 | -2.47318 | 4.70946  |
| H | -0.53092 | -6.48096 | 1.19410  |
| H | -4.34912 | -2.50241 | -3.90739 |
| H | 4.53245  | -1.64918 | -0.75823 |
| H | -6.76801 | 0.59009  | -0.00821 |
| H | -1.07067 | 5.70659  | -0.70118 |

|   |          |          |          |
|---|----------|----------|----------|
| H | -0.22522 | 4.50291  | -3.81048 |
| H | 4.42749  | -1.17847 | 2.79689  |
| H | 0.55060  | -0.13683 | 0.88658  |
| O | -4.16243 | -2.01532 | 0.21114  |
| H | -5.05048 | -1.56582 | 0.11313  |
| H | -4.31718 | -2.92802 | 0.59767  |

Nle,H

|    |          |          |          |
|----|----------|----------|----------|
| Cu | -1.98234 | 1.11297  | 1.14783  |
| Cu | -0.26399 | -1.49549 | -0.86902 |
| Cu | 1.95387  | 1.44130  | -0.33441 |
| O  | 0.58770  | 0.17461  | -0.21848 |
| O  | -1.70201 | -0.69798 | 0.12069  |
| C  | 2.14225  | -0.54609 | 3.14248  |
| N  | 3.48194  | -0.38755 | 2.79667  |
| C  | 1.46392  | 0.38001  | 2.39570  |
| C  | 3.57957  | 0.58592  | 1.86357  |
| N  | 2.36600  | 1.07351  | 1.58779  |
| H  | 0.40483  | 0.57000  | 2.34654  |
| H  | 4.49846  | 0.90880  | 1.39017  |
| C  | -0.57992 | 3.99279  | 1.77782  |
| N  | -1.13039 | 2.99353  | 0.96438  |
| C  | -0.56691 | 5.19509  | 1.13557  |
| C  | -1.42906 | 3.62432  | -0.17466 |
| N  | -1.10939 | 4.94640  | -0.10316 |
| H  | -0.23097 | 6.16726  | 1.45484  |
| H  | -1.83172 | 3.17138  | -1.06066 |
| C  | -3.03508 | -0.35931 | 4.98906  |
| N  | -2.80495 | -1.52150 | 4.26224  |
| C  | -2.73776 | 0.67989  | 4.14276  |
| C  | -2.38094 | -1.14671 | 3.01508  |
| N  | -2.33096 | 0.18035  | 2.91309  |
| H  | -2.78363 | 1.74079  | 4.33422  |
| H  | -2.12616 | -1.82706 | 2.22179  |
| C  | -0.05623 | -4.51899 | 2.14739  |
| N  | -0.36029 | -5.43202 | 1.14659  |
| C  | -0.01633 | -3.29060 | 1.54671  |
| C  | -0.49249 | -4.71786 | -0.02151 |
| N  | -0.29252 | -3.42183 | 0.19813  |
| H  | 0.19845  | -2.32931 | 1.98258  |
| H  | -0.71947 | -5.16695 | -0.97804 |
| C  | -0.64809 | 2.40780  | -3.40008 |
| N  | 0.02579  | 3.61731  | -3.29561 |
| C  | -0.01279 | 1.55206  | -2.54757 |
| C  | 1.03561  | 3.46306  | -2.39407 |
| N  | 1.02646  | 2.21962  | -1.91858 |

|   |          |          |          |
|---|----------|----------|----------|
| H | -0.24560 | 0.53042  | -2.32588 |
| H | 1.72402  | 4.24436  | -2.10458 |
| C | 3.52410  | -0.89954 | -2.28580 |
| N | 3.71724  | -1.54423 | -1.07518 |
| C | 2.20646  | -1.10620 | -2.62471 |
| C | 2.53673  | -2.11030 | -0.71939 |
| N | 1.59395  | -1.86053 | -1.63263 |
| H | 1.66471  | -0.76380 | -3.49246 |
| H | 2.38581  | -2.64949 | 0.20300  |
| C | -2.00399 | -2.99142 | -4.53684 |
| N | -3.10457 | -2.59460 | -3.78736 |
| C | -0.90881 | -2.66225 | -3.77213 |
| C | -2.66088 | -2.05658 | -2.61903 |
| N | -1.33129 | -2.07719 | -2.58274 |
| H | 0.13775  | -2.81250 | -3.98483 |
| H | -3.31433 | -1.76872 | -1.80965 |
| C | -5.19870 | 1.17584  | -1.52252 |
| N | -5.85459 | 0.77040  | -0.36903 |
| C | -3.95255 | 1.57333  | -1.12274 |
| C | -4.98756 | 0.96008  | 0.68300  |
| N | -3.82369 | 1.43163  | 0.25068  |
| H | -3.14002 | 1.91058  | -1.74307 |
| H | -5.23438 | 0.74389  | 1.71288  |
| C | 6.65226  | -1.31751 | 1.00969  |
| O | 5.42003  | -1.62726 | 0.89130  |
| O | 7.24528  | -0.27759 | 0.54466  |
| O | 3.63601  | 2.31429  | -0.82913 |
| O | 5.78585  | 1.68782  | 0.15841  |
| H | 3.70884  | 2.33998  | -1.80654 |
| H | 6.20823  | 2.42849  | 0.67103  |
| H | 6.41985  | 0.79256  | 0.21234  |
| H | 4.59226  | 2.01497  | -0.44487 |
| H | -2.56613 | -1.16640 | 0.09861  |
| H | 7.27387  | -2.01736 | 1.58684  |
| H | 1.82026  | -1.33258 | 3.80858  |
| H | -0.18665 | 3.91312  | 2.75836  |
| H | -3.37400 | -0.38024 | 6.00461  |
| H | 0.10002  | -4.78709 | 3.16669  |
| H | -1.50587 | 2.26102  | -4.02567 |
| H | 4.33572  | -0.37582 | -2.75199 |
| H | -2.12720 | -3.47196 | -5.49522 |
| H | -5.67280 | 1.17829  | -2.48168 |
| H | -2.93322 | -2.49326 | 4.62177  |
| H | -0.43775 | -6.46909 | 1.28386  |
| H | -4.09088 | -2.67225 | -4.07096 |
| H | 4.57233  | -1.50059 | -0.45071 |

|   |          |          |          |
|---|----------|----------|----------|
| H | -6.81663 | 0.38548  | -0.35084 |
| H | -1.25215 | 5.67276  | -0.79713 |
| H | -0.19914 | 4.46157  | -3.83945 |
| H | 4.25649  | -0.99332 | 3.08674  |
| O | -4.09848 | -1.99409 | 0.03999  |
| H | -4.95546 | -1.48700 | 0.12283  |
| H | -4.20289 | -2.85386 | 0.54573  |
| H | -0.18632 | 0.58562  | 0.21925  |

NI2e,H

|    |          |          |          |
|----|----------|----------|----------|
| Cu | 1.97341  | -1.19599 | 1.03928  |
| Cu | 0.15565  | 1.56535  | -0.88866 |
| Cu | -1.80180 | -1.62306 | -0.28118 |
| O  | -0.85759 | 0.16782  | -0.09587 |
| O  | 1.64073  | 0.54843  | -0.06764 |
| C  | -2.19973 | 0.18961  | 3.21121  |
| N  | -3.52079 | 0.07478  | 2.78868  |
| C  | -1.50455 | -0.75141 | 2.49244  |
| C  | -3.57527 | -0.88875 | 1.82082  |
| N  | -2.35870 | -1.40390 | 1.60366  |
| H  | -0.44777 | -0.96868 | 2.50814  |
| H  | -4.46708 | -1.16140 | 1.27092  |
| C  | 0.65943  | -4.13704 | 1.42190  |
| N  | 1.33247  | -3.10665 | 0.76460  |
| C  | 0.60733  | -5.26351 | 0.65624  |
| C  | 1.68011  | -3.63613 | -0.40656 |
| N  | 1.26491  | -4.92733 | -0.50434 |
| H  | 0.17495  | -6.23210 | 0.84050  |
| H  | 2.18945  | -3.13644 | -1.20600 |
| C  | 2.99130  | -0.00148 | 4.99301  |
| N  | 2.75542  | 1.21714  | 4.36714  |
| C  | 2.72662  | -0.96460 | 4.04906  |
| C  | 2.36010  | 0.94688  | 3.08048  |
| N  | 2.33284  | -0.36604 | 2.85878  |
| H  | 2.78414  | -2.03782 | 4.14457  |
| H  | 2.11022  | 1.69775  | 2.35136  |
| C  | -0.02192 | 4.33036  | 2.51114  |
| N  | 0.27785  | 5.34176  | 1.60598  |
| C  | 0.01046  | 3.16110  | 1.79446  |
| C  | 0.47994  | 4.74341  | 0.38495  |
| N  | 0.33121  | 3.42788  | 0.47463  |
| H  | -0.20239 | 2.15516  | 2.11995  |
| H  | 0.71457  | 5.29098  | -0.51707 |
| C  | 0.81653  | -2.13050 | -3.47973 |
| N  | 0.12899  | -3.34074 | -3.54040 |

|   |          |          |          |
|---|----------|----------|----------|
| C | 0.30729  | -1.47536 | -2.38243 |
| C | -0.76791 | -3.36267 | -2.50194 |
| N | -0.67812 | -2.25197 | -1.77763 |
| H | 0.59286  | -0.52883 | -1.96035 |
| H | -1.44243 | -4.18244 | -2.30613 |
| C | -3.58073 | 1.13864  | -2.28923 |
| N | -3.78275 | 1.65852  | -1.01999 |
| C | -2.30388 | 1.48452  | -2.65379 |
| C | -2.63001 | 2.28086  | -0.65777 |
| N | -1.70729 | 2.19655  | -1.62153 |
| H | -1.77048 | 1.25265  | -3.56307 |
| H | -2.47693 | 2.73048  | 0.31022  |
| C | 1.96598  | 3.44315  | -4.26481 |
| N | 3.06458  | 2.98103  | -3.55110 |
| C | 0.86734  | 3.04312  | -3.54368 |
| C | 2.61079  | 2.32607  | -2.44477 |
| N | 1.28101  | 2.34541  | -2.41678 |
| H | -0.17804 | 3.21000  | -3.74696 |
| H | 3.25717  | 1.92548  | -1.68006 |
| C | 5.21705  | -0.91724 | -1.60141 |
| N | 5.86732  | -0.62205 | -0.41516 |
| C | 3.96459  | -1.33574 | -1.24391 |
| C | 4.99383  | -0.88536 | 0.60903  |
| N | 3.83110  | -1.31592 | 0.13523  |
| H | 3.14926  | -1.59952 | -1.89434 |
| H | 5.23941  | -0.76229 | 1.65443  |
| C | -6.71919 | 1.10126  | 1.04428  |
| O | -5.48352 | 1.41157  | 0.95963  |
| O | -7.32366 | 0.11152  | 0.50126  |
| O | -3.60456 | -2.20585 | -1.29390 |
| O | -5.79398 | -1.79801 | -0.11558 |
| H | -3.61507 | -1.79730 | -2.18121 |
| H | -6.16040 | -2.59115 | 0.36620  |
| H | -6.43464 | -0.96343 | 0.05099  |
| H | -4.51758 | -2.00905 | -0.87133 |
| H | 2.45413  | 1.07765  | 0.05790  |
| H | -7.33413 | 1.76413  | 1.67374  |
| H | -1.88347 | 0.98393  | 3.87055  |
| H | 0.22510  | -4.11418 | 2.38281  |
| H | 3.31316  | -0.06539 | 6.01626  |
| H | -0.22227 | 4.51092  | 3.54600  |
| H | 1.55721  | -1.85311 | -4.22049 |
| H | -4.33938 | 0.55950  | -2.76815 |
| H | 2.08375  | 3.99631  | -5.17966 |
| H | 5.69387  | -0.83646 | -2.55506 |
| H | 2.84301  | 2.15225  | 4.81948  |

|   |          |          |          |
|---|----------|----------|----------|
| H | 0.29719  | 6.36004  | 1.82138  |
| H | 4.05237  | 3.10987  | -3.81490 |
| H | -4.61099 | 1.47552  | -0.37959 |
| H | 6.80941  | -0.21284 | -0.35426 |
| H | 1.34479  | -5.53758 | -1.30383 |
| H | 0.28932  | -4.08396 | -4.23733 |
| H | -4.30851 | 0.66636  | 3.10262  |
| H | -0.13387 | -0.21352 | 0.43841  |
| O | 3.86316  | 2.19687  | 0.31230  |
| H | 4.34079  | 1.86558  | 1.12855  |
| H | 3.34068  | 3.00697  | 0.59316  |

Nle,2H

|    |          |          |          |
|----|----------|----------|----------|
| Cu | 1.97341  | -1.19599 | 1.03928  |
| Cu | 0.15565  | 1.56535  | -0.88866 |
| Cu | -1.80180 | -1.62306 | -0.28118 |
| O  | -0.85759 | 0.16782  | -0.09587 |
| O  | 1.64073  | 0.54843  | -0.06764 |
| C  | -2.19973 | 0.18961  | 3.21121  |
| N  | -3.52079 | 0.07478  | 2.78868  |
| C  | -1.50455 | -0.75141 | 2.49244  |
| C  | -3.57527 | -0.88875 | 1.82082  |
| N  | -2.35870 | -1.40390 | 1.60366  |
| H  | -0.44777 | -0.96868 | 2.50814  |
| H  | -4.46708 | -1.16140 | 1.27092  |
| C  | 0.65943  | -4.13704 | 1.42190  |
| N  | 1.33247  | -3.10665 | 0.76460  |
| C  | 0.60733  | -5.26351 | 0.65624  |
| C  | 1.68011  | -3.63613 | -0.40656 |
| N  | 1.26491  | -4.92733 | -0.50434 |
| H  | 0.17495  | -6.23210 | 0.84050  |
| H  | 2.18945  | -3.13644 | -1.20600 |
| C  | 2.99130  | -0.00148 | 4.99301  |
| N  | 2.75542  | 1.21714  | 4.36714  |
| C  | 2.72662  | -0.96460 | 4.04906  |
| C  | 2.36010  | 0.94688  | 3.08048  |
| N  | 2.33284  | -0.36604 | 2.85878  |
| H  | 2.78414  | -2.03782 | 4.14457  |
| H  | 2.11022  | 1.69775  | 2.35136  |
| C  | -0.02192 | 4.33036  | 2.51114  |
| N  | 0.27785  | 5.34176  | 1.60598  |
| C  | 0.01046  | 3.16110  | 1.79446  |
| C  | 0.47994  | 4.74341  | 0.38495  |
| N  | 0.33121  | 3.42788  | 0.47463  |
| H  | -0.20239 | 2.15516  | 2.11995  |
| H  | 0.71457  | 5.29098  | -0.51707 |



|   |          |          |          |
|---|----------|----------|----------|
| C | 0.81653  | -2.13050 | -3.47973 |
| N | 0.12899  | -3.34074 | -3.54040 |
| C | 0.30729  | -1.47536 | -2.38243 |
| C | -0.76791 | -3.36267 | -2.50194 |
| N | -0.67812 | -2.25197 | -1.77763 |
| H | 0.59286  | -0.52883 | -1.96035 |
| H | -1.44243 | -4.18244 | -2.30613 |
| C | -3.58073 | 1.13864  | -2.28923 |
| N | -3.78275 | 1.65852  | -1.01999 |
| C | -2.30388 | 1.48452  | -2.65379 |
| C | -2.63001 | 2.28086  | -0.65777 |
| N | -1.70729 | 2.19655  | -1.62153 |
| H | -1.77048 | 1.25265  | -3.56307 |
| H | -2.47693 | 2.73048  | 0.31022  |
| C | 1.96598  | 3.44315  | -4.26481 |
| N | 3.06458  | 2.98103  | -3.55110 |
| C | 0.86734  | 3.04312  | -3.54368 |
| C | 2.61079  | 2.32607  | -2.44477 |
| N | 1.28101  | 2.34541  | -2.41678 |
| H | -0.17804 | 3.21000  | -3.74696 |
| H | 3.25717  | 1.92548  | -1.68006 |
| C | 5.21705  | -0.91724 | -1.60141 |
| N | 5.86732  | -0.62205 | -0.41516 |
| C | 3.96459  | -1.33574 | -1.24391 |
| C | 4.99383  | -0.88536 | 0.60903  |
| N | 3.83110  | -1.31592 | 0.13523  |
| H | 3.14926  | -1.59952 | -1.89434 |
| H | 5.23941  | -0.76229 | 1.65443  |
| C | -6.71919 | 1.10126  | 1.04428  |
| O | -5.48352 | 1.41157  | 0.95963  |
| O | -7.32366 | 0.11152  | 0.50126  |
| O | -3.60456 | -2.20585 | -1.29390 |
| O | -5.79398 | -1.79801 | -0.11558 |
| H | -3.61507 | -1.79730 | -2.18121 |
| H | -6.16040 | -2.59115 | 0.36620  |
| H | -6.43464 | -0.96343 | 0.05099  |
| H | -4.51758 | -2.00905 | -0.87133 |
| H | 2.45413  | 1.07765  | 0.05790  |
| H | -7.33413 | 1.76413  | 1.67374  |
| H | -1.88347 | 0.98393  | 3.87055  |
| H | 0.22510  | -4.11418 | 2.38281  |
| H | 3.31316  | -0.06539 | 6.01626  |
| H | -0.22227 | 4.51092  | 3.54600  |
| H | 1.55721  | -1.85311 | -4.22049 |
| H | -4.33938 | 0.55950  | -2.76815 |
| H | 2.08375  | 3.99631  | -5.17966 |

|   |          |          |          |
|---|----------|----------|----------|
| H | 5.69387  | -0.83646 | -2.55506 |
| H | 2.84301  | 2.15225  | 4.81948  |
| H | 0.29719  | 6.36004  | 1.82138  |
| H | 4.05237  | 3.10987  | -3.81490 |
| H | -4.61099 | 1.47552  | -0.37959 |
| H | 6.80941  | -0.21284 | -0.35426 |
| H | 1.34479  | -5.53758 | -1.30383 |
| H | 0.28932  | -4.08396 | -4.23733 |
| H | -4.30851 | 0.66636  | 3.10262  |
| H | -0.13387 | -0.21352 | 0.43841  |
| O | 3.86316  | 2.19687  | 0.31230  |
| H | 4.34079  | 1.86558  | 1.12855  |
| H | 3.34068  | 3.00697  | 0.59316  |

NI<sub>2</sub>e,<sub>2</sub>H (MV)

|    |          |          |          |
|----|----------|----------|----------|
| Cu | -2.29349 | 1.54947  | 1.24890  |
| Cu | -0.01248 | -1.75677 | -0.90629 |
| Cu | 1.69553  | 1.54559  | -0.35845 |
| O  | 0.55412  | -0.04138 | -0.14597 |
| O  | -1.92484 | -1.32347 | 0.09018  |
| C  | 2.13688  | 0.01451  | 3.22906  |
| N  | 3.45954  | 0.15893  | 2.82964  |
| C  | 1.41749  | 0.88541  | 2.45497  |
| C  | 3.49909  | 1.06624  | 1.81593  |
| N  | 2.26605  | 1.51745  | 1.55205  |
| H  | 0.35791  | 1.08826  | 2.46891  |
| H  | 4.38991  | 1.34779  | 1.26595  |
| C  | -0.83665 | 4.26759  | 1.27607  |
| N  | -1.71342 | 3.32783  | 0.74859  |
| C  | -0.64321 | 5.29167  | 0.40184  |
| C  | -2.05995 | 3.80050  | -0.44899 |
| N  | -1.42634 | 4.97297  | -0.68347 |
| H  | -0.04464 | 6.18451  | 0.46507  |
| H  | -2.74341 | 3.34194  | -1.14140 |
| C  | -3.06263 | 0.10823  | 4.90255  |
| N  | -2.76667 | -1.11179 | 4.31504  |
| C  | -2.76730 | 1.06508  | 3.97178  |
| C  | -2.31096 | -0.86364 | 3.05345  |
| N  | -2.29951 | 0.45048  | 2.81315  |
| H  | -2.84096 | 2.13792  | 4.06080  |
| H  | -2.02103 | -1.62720 | 2.35796  |
| C  | 0.17206  | -4.19909 | 2.58690  |
| N  | -0.07185 | -5.24278 | 1.70248  |
| C  | 0.22783  | -3.06399 | 1.82021  |
| C  | -0.14472 | -4.70038 | 0.44212  |
| N  | 0.01909  | -3.38605 | 0.49277  |

|   |          |          |          |
|---|----------|----------|----------|
| H | 0.42518  | -2.04860 | 2.12314  |
| H | -0.30419 | -5.28299 | -0.45466 |
| C | -0.78291 | 2.08136  | -3.59659 |
| N | -0.13595 | 3.31009  | -3.64827 |
| C | -0.29902 | 1.44293  | -2.48754 |
| C | 0.72155  | 3.36756  | -2.58119 |
| N | 0.63444  | 2.25289  | -1.86153 |
| H | -0.52604 | 0.46720  | -2.09584 |
| H | 1.37369  | 4.20177  | -2.36904 |
| C | 3.70490  | -1.01930 | -2.19659 |
| N | 3.89683  | -1.50338 | -0.91519 |
| C | 2.46530  | -1.45076 | -2.59589 |
| C | 2.77988  | -2.20124 | -0.57987 |
| N | 1.88496  | -2.18474 | -1.57265 |
| H | 1.95399  | -1.27839 | -3.53065 |
| H | 2.63717  | -2.67007 | 0.38097  |
| C | -1.72409 | -3.53547 | -4.27250 |
| N | -2.84917 | -3.05926 | -3.61729 |
| C | -0.64931 | -3.06929 | -3.56293 |
| C | -2.42822 | -2.32322 | -2.55070 |
| N | -1.10026 | -2.31773 | -2.49103 |
| H | 0.40269  | -3.22952 | -3.73593 |
| H | -3.08142 | -1.81708 | -1.86217 |
| C | -5.13070 | 0.69836  | -1.79897 |
| N | -5.80023 | 0.39087  | -0.62330 |
| C | -3.86216 | 1.06074  | -1.41640 |
| C | -4.94195 | 0.58225  | 0.41755  |
| N | -3.75540 | 0.99404  | -0.03051 |
| H | -3.02350 | 1.34124  | -2.03132 |
| H | -5.19928 | 0.40916  | 1.45340  |
| C | 6.71885  | -0.81354 | 1.21769  |
| O | 5.49314  | -1.16785 | 1.15198  |
| O | 7.28000  | 0.16903  | 0.61422  |
| O | 3.44369  | 2.20710  | -1.22776 |
| O | 5.65496  | 1.93570  | -0.10982 |
| H | 3.48150  | 1.92365  | -2.16265 |
| H | 6.01378  | 2.78916  | 0.25426  |
| H | 6.35313  | 1.13955  | 0.10122  |
| H | 4.38733  | 2.05394  | -0.82092 |
| H | -2.52353 | -2.06533 | 0.41513  |
| H | 7.36172  | -1.41867 | 1.87752  |
| H | 1.83255  | -0.75340 | 3.91039  |
| H | -0.39262 | 4.23364  | 2.22935  |
| H | -3.44952 | 0.18718  | 5.89152  |
| H | 0.29090  | -4.33875 | 3.63996  |
| H | -1.47729 | 1.75639  | -4.34180 |

|   |          |          |          |
|---|----------|----------|----------|
| H | 4.45047  | -0.42832 | -2.67183 |
| H | -1.79624 | -4.13035 | -5.15324 |
| H | -5.62336 | 0.65365  | -2.75646 |
| H | -2.87895 | -2.04561 | 4.76864  |
| H | -0.12467 | -6.24876 | 1.95393  |
| H | -3.82720 | -3.27062 | -3.86476 |
| H | 4.68634  | -1.27064 | -0.25273 |
| H | -6.77754 | 0.05377  | -0.56888 |
| H | -1.45733 | 5.52226  | -1.52296 |
| H | -0.27940 | 4.02522  | -4.38697 |
| H | 4.26620  | -0.37959 | 3.19695  |
| O | -3.31462 | -3.30045 | 0.97030  |
| H | -3.95628 | -3.73388 | 0.33067  |
| H | -2.66932 | -4.01429 | 1.25093  |
| H | 0.00756  | 0.07566  | 0.65597  |
| H | -2.33811 | -0.46535 | 0.30075  |

NI<sub>2</sub>e,2H (L)

|    |          |          |          |
|----|----------|----------|----------|
| Cu | 2.00403  | -1.26687 | 1.06130  |
| Cu | 0.18734  | 1.77889  | -0.88286 |
| Cu | -1.84766 | -1.82580 | -0.31208 |
| O  | -0.90100 | 0.20495  | -0.06585 |
| O  | 1.49301  | 0.57330  | -0.06482 |
| C  | -2.18795 | 0.13301  | 3.18219  |
| N  | -3.50929 | 0.02752  | 2.76112  |
| C  | -1.49907 | -0.81371 | 2.45887  |
| C  | -3.57890 | -0.93154 | 1.79046  |
| N  | -2.36440 | -1.45460 | 1.56138  |
| H  | -0.44919 | -1.06435 | 2.49683  |
| H  | -4.47936 | -1.20082 | 1.24399  |
| C  | 0.63452  | -4.17876 | 1.31575  |
| N  | 1.39376  | -3.17137 | 0.71893  |
| C  | 0.53654  | -5.26717 | 0.50196  |
| C  | 1.75617  | -3.67953 | -0.45932 |
| N  | 1.25478  | -4.93159 | -0.62214 |
| H  | 0.04394  | -6.21541 | 0.63574  |
| H  | 2.34968  | -3.18971 | -1.20772 |
| C  | 2.96047  | -0.15707 | 5.00553  |
| N  | 2.76484  | 1.08120  | 4.40549  |
| C  | 2.65864  | -1.08783 | 4.04037  |
| C  | 2.36852  | 0.86215  | 3.11479  |
| N  | 2.28997  | -0.44400 | 2.86221  |
| H  | 2.67861  | -2.16445 | 4.10985  |
| H  | 2.21233  | 1.64545  | 2.39445  |
| C  | 0.00276  | 4.26567  | 2.60390  |
| N  | 0.29770  | 5.28952  | 1.71456  |

|   |          |          |          |
|---|----------|----------|----------|
| C | -0.01367 | 3.11078  | 1.86904  |
| C | 0.44302  | 4.71819  | 0.47505  |
| N | 0.26389  | 3.40214  | 0.54549  |
| H | -0.21037 | 2.10451  | 2.20190  |
| H | 0.66110  | 5.27695  | -0.42443 |
| C | 0.83386  | -2.05906 | -3.52952 |
| N | 0.15028  | -3.26932 | -3.61177 |
| C | 0.32080  | -1.43024 | -2.41478 |
| C | -0.73959 | -3.32445 | -2.57248 |
| N | -0.65655 | -2.22955 | -1.81747 |
| H | 0.61827  | -0.48863 | -1.98796 |
| H | -1.40764 | -4.15489 | -2.39761 |
| C | -3.52635 | 1.21577  | -2.28631 |
| N | -3.74685 | 1.73746  | -1.02267 |
| C | -2.24552 | 1.56917  | -2.63697 |
| C | -2.61724 | 2.39583  | -0.65541 |
| N | -1.67485 | 2.30144  | -1.60488 |
| H | -1.69905 | 1.33882  | -3.53877 |
| H | -2.49858 | 2.89838  | 0.29361  |
| C | 2.05001  | 3.50621  | -4.19389 |
| N | 3.13366  | 3.01957  | -3.47606 |
| C | 0.93439  | 3.09742  | -3.51277 |
| C | 2.65828  | 2.33982  | -2.39716 |
| N | 1.32663  | 2.36895  | -2.39987 |
| H | -0.10459 | 3.27838  | -3.73618 |
| H | 3.27451  | 1.93105  | -1.61208 |
| C | 5.21839  | -0.87177 | -1.60928 |
| N | 5.86436  | -0.61687 | -0.41132 |
| C | 3.93404  | -1.20775 | -1.27304 |
| C | 4.96587  | -0.83154 | 0.60053  |
| N | 3.78555  | -1.18573 | 0.10382  |
| H | 3.11149  | -1.43248 | -1.93002 |
| H | 5.20301  | -0.73421 | 1.65085  |
| C | -6.67215 | 1.14131  | 1.02991  |
| O | -5.42767 | 1.43908  | 0.96963  |
| O | -7.26959 | 0.17050  | 0.44751  |
| O | -3.62809 | -2.21968 | -1.32819 |
| O | -5.75635 | -1.75909 | -0.09082 |
| H | -3.64616 | -1.85035 | -2.23335 |
| H | -6.21168 | -2.56771 | 0.26849  |
| H | -6.40034 | -0.90870 | 0.02898  |
| H | -4.54131 | -2.01092 | -0.89715 |
| H | 2.30413  | 1.07607  | 0.17684  |
| H | -7.30102 | 1.78888  | 1.66787  |
| H | -1.87048 | 0.90309  | 3.87450  |
| H | 0.19684  | -4.17862 | 2.27680  |

|   |          |          |          |
|---|----------|----------|----------|
| H | 3.30370  | -0.24801 | 6.02226  |
| H | -0.17340 | 4.42031  | 3.64305  |
| H | 1.58755  | -1.77419 | -4.26346 |
| H | -4.29338 | 0.66099  | -2.78545 |
| H | 2.17610  | 4.09096  | -5.07994 |
| H | 5.72453  | -0.83816 | -2.55219 |
| H | 2.86173  | 2.00200  | 4.87624  |
| H | 0.37357  | 6.30478  | 1.96585  |
| H | 4.12839  | 3.15296  | -3.72625 |
| H | -4.56937 | 1.52241  | -0.37720 |
| H | 6.83378  | -0.27809 | -0.33121 |
| H | 1.32319  | -5.52479 | -1.43671 |
| H | 0.29821  | -3.99144 | -4.34028 |
| H | -4.29416 | 0.62771  | 3.08626  |
| H | -0.05291 | -0.12228 | 0.34581  |
| O | 3.63548  | 2.10071  | 0.46625  |
| H | 4.51362  | 1.78565  | 0.83004  |
| H | 3.55858  | 3.08212  | 0.65881  |
| H | -1.45716 | 0.50509  | 0.68285  |

NI2e,3H

|    |          |          |          |
|----|----------|----------|----------|
| Cu | 2.16102  | -1.80167 | 1.35203  |
| Cu | 0.37405  | 1.99759  | -0.76634 |
| Cu | -2.00762 | -1.79367 | -0.40557 |
| O  | 0.21822  | 0.11250  | 0.11423  |
| O  | 2.19112  | 1.92362  | 0.19160  |
| C  | -2.20282 | 0.20064  | 3.13658  |
| N  | -3.52607 | 0.17176  | 2.71025  |
| C  | -1.52670 | -0.64688 | 2.29871  |
| C  | -3.61463 | -0.64295 | 1.62719  |
| N  | -2.40488 | -1.14791 | 1.33663  |
| H  | -0.48518 | -0.92088 | 2.31026  |
| H  | -4.52637 | -0.86863 | 1.07921  |
| C  | 0.42988  | -4.34065 | 1.29616  |
| N  | 1.43491  | -3.50629 | 0.81923  |
| C  | 0.14500  | -5.31560 | 0.39141  |
| C  | 1.75742  | -3.99067 | -0.38229 |
| N  | 0.99425  | -5.07041 | -0.66248 |
| H  | -0.55207 | -6.13636 | 0.41863  |
| H  | 2.52330  | -3.60974 | -1.03719 |
| C  | 2.91529  | -0.41755 | 5.01601  |
| N  | 2.75585  | 0.82524  | 4.42203  |
| C  | 2.57192  | -1.34458 | 4.07320  |
| C  | 2.33568  | 0.61968  | 3.13784  |
| N  | 2.21075  | -0.68964 | 2.90026  |
| H  | 2.54554  | -2.41983 | 4.16210  |

|   |          |          |          |
|---|----------|----------|----------|
| H | 2.13419  | 1.40501  | 2.42598  |
| C | 0.04216  | 4.18554  | 2.66250  |
| N | 0.36629  | 5.21640  | 1.79216  |
| C | -0.17636 | 3.08675  | 1.88100  |
| C | 0.32481  | 4.72504  | 0.52260  |
| N | 0.00216  | 3.43637  | 0.55398  |
| H | -0.45183 | 2.08533  | 2.16782  |
| H | 0.51245  | 5.31190  | -0.36542 |
| C | 0.63127  | -2.09670 | -3.58146 |
| N | -0.08076 | -3.28677 | -3.64167 |
| C | 0.11313  | -1.41233 | -2.51259 |
| C | -0.99173 | -3.28963 | -2.62596 |
| N | -0.89246 | -2.16615 | -1.91094 |
| H | 0.38441  | -0.43762 | -2.15506 |
| H | -1.69253 | -4.09165 | -2.44279 |
| C | -3.48672 | 1.17964  | -2.18320 |
| N | -3.67342 | 1.67419  | -0.90728 |
| C | -2.13755 | 1.28803  | -2.44806 |
| C | -2.47658 | 2.06858  | -0.42952 |
| N | -1.51327 | 1.85237  | -1.33794 |
| H | -1.58368 | 1.00819  | -3.33006 |
| H | -2.34041 | 2.49027  | 0.55185  |
| C | 2.10394  | 3.34861  | -4.18384 |
| N | 3.17348  | 2.74945  | -3.53220 |
| C | 0.97575  | 2.89157  | -3.55518 |
| C | 2.67716  | 1.93791  | -2.56804 |
| N | 1.34630  | 2.01865  | -2.53846 |
| H | -0.05918 | 3.12437  | -3.75400 |
| H | 3.29989  | 1.32617  | -1.93953 |
| C | 5.07786  | -1.09017 | -1.64067 |
| N | 5.73495  | -0.83601 | -0.44741 |
| C | 3.76456  | -1.30661 | -1.29834 |
| C | 4.82601  | -0.91102 | 0.56473  |
| N | 3.61576  | -1.20322 | 0.08221  |
| H | 2.92800  | -1.53223 | -1.94013 |
| H | 5.07144  | -0.76314 | 1.60762  |
| C | -6.66614 | 1.43859  | 1.04170  |
| O | -5.43063 | 1.76776  | 0.96549  |
| O | -7.26997 | 0.51489  | 0.39366  |
| O | -3.80721 | -2.25385 | -1.32596 |
| O | -5.85828 | -1.46555 | -0.15565 |
| H | -3.82363 | -2.06763 | -2.28609 |
| H | -6.33647 | -2.20904 | 0.30338  |
| H | -6.45439 | -0.57208 | -0.05934 |
| H | -4.69930 | -1.90602 | -0.92746 |
| H | 2.78801  | 2.72994  | -0.02362 |

|   |          |          |          |
|---|----------|----------|----------|
| H | -7.26919 | 2.01495  | 1.75957  |
| H | -1.86906 | 0.86301  | 3.91820  |
| H | -0.03493 | -4.28122 | 2.23840  |
| H | 3.26100  | -0.54125 | 6.01606  |
| H | -0.02105 | 4.30581  | 3.72206  |
| H | 1.41973  | -1.85060 | -4.27791 |
| H | -4.34113 | 0.81791  | -2.72856 |
| H | 2.25816  | 3.99340  | -5.01999 |
| H | 5.60283  | -1.11723 | -2.58162 |
| H | 2.91441  | 1.74197  | 4.90322  |
| H | 0.59620  | 6.18836  | 2.06713  |
| H | 4.17622  | 2.95430  | -3.69122 |
| H | -4.56406 | 1.65706  | -0.30695 |
| H | 6.75072  | -0.63979 | -0.36088 |
| H | 1.00912  | -5.62478 | -1.49984 |
| H | 0.03422  | -4.00823 | -4.37571 |
| H | -4.30720 | 0.70459  | 3.14222  |
| H | -0.55219 | -0.50218 | -0.03973 |
| H | 2.71461  | 1.09903  | 0.08139  |
| O | 3.52256  | 3.98069  | -0.37645 |
| H | 3.44612  | 4.39596  | -1.27833 |
| H | 3.61917  | 4.70772  | 0.29977  |
| H | 0.86918  | -0.38837 | 0.65644  |

NI<sub>3e</sub>,2H

|    |          |          |          |
|----|----------|----------|----------|
| Cu | 1.73702  | -1.28688 | 1.08634  |
| Cu | 0.26600  | 1.65500  | -1.14318 |
| Cu | -2.10150 | -1.61852 | -0.01994 |
| O  | 0.54516  | 0.04315  | 0.05819  |
| O  | 4.12057  | 2.27547  | -0.10072 |
| C  | -1.99971 | 0.92483  | 3.10510  |
| N  | -3.36425 | 0.85138  | 2.84748  |
| C  | -1.40761 | -0.01381 | 2.30528  |
| C  | -3.56377 | -0.10507 | 1.90019  |
| N  | -2.39103 | -0.64931 | 1.55283  |
| H  | -0.36468 | -0.24119 | 2.15812  |
| H  | -4.52465 | -0.38933 | 1.48317  |
| C  | 0.24826  | -4.00758 | 1.93519  |
| N  | 1.08482  | -3.21527 | 1.15427  |
| C  | -0.05480 | -5.17886 | 1.30600  |
| C  | 1.28546  | -3.92850 | 0.04715  |
| N  | 0.61361  | -5.11481 | 0.10601  |
| H  | -0.65648 | -6.01893 | 1.60911  |
| H  | 1.88905  | -3.63438 | -0.79339 |
| C  | 3.24301  | 0.31867  | 4.68295  |



|   |          |          |          |
|---|----------|----------|----------|
| N | 3.11279  | 1.45384  | 3.88492  |
| C | 2.75362  | -0.72383 | 3.93815  |
| C | 2.53980  | 1.05188  | 2.69985  |
| N | 2.30994  | -0.25716 | 2.70448  |
| H | 2.67979  | -1.76686 | 4.20330  |
| H | 2.34748  | 1.72877  | 1.88365  |
| C | 0.47576  | 4.55905  | 1.79734  |
| N | 0.80709  | 5.38932  | 0.73396  |
| C | 0.35926  | 3.29877  | 1.27461  |
| C | 0.88987  | 4.59040  | -0.38680 |
| N | 0.63137  | 3.31941  | -0.08441 |
| H | 0.09972  | 2.37794  | 1.76686  |
| H | 1.14338  | 4.95972  | -1.36974 |
| C | 0.14388  | -2.71378 | -3.24449 |
| N | -0.64311 | -3.84637 | -3.05492 |
| C | -0.22753 | -1.82774 | -2.26647 |
| C | -1.45796 | -3.61257 | -1.98333 |
| N | -1.21871 | -2.40209 | -1.47966 |
| H | 0.15730  | -0.84527 | -2.03987 |
| H | -2.18706 | -4.31506 | -1.60806 |
| C | -3.73789 | 1.01913  | -2.14933 |
| N | -3.80215 | 1.75299  | -0.98158 |
| C | -2.41428 | 1.02314  | -2.53377 |
| C | -2.54271 | 2.17649  | -0.69844 |
| N | -1.67473 | 1.75142  | -1.61452 |
| H | -1.94680 | 0.55674  | -3.38678 |
| H | -2.29277 | 2.75705  | 0.17622  |
| C | 1.77589  | 2.47837  | -4.91191 |
| N | 2.88270  | 1.98878  | -4.23556 |
| C | 0.71208  | 2.25772  | -4.06982 |
| C | 2.46823  | 1.49959  | -3.03032 |
| N | 1.15685  | 1.65639  | -2.89503 |
| H | -0.33006 | 2.49607  | -4.21217 |
| H | 3.13776  | 1.08199  | -2.29459 |
| C | 4.77623  | -1.63300 | -1.87844 |
| N | 5.54309  | -1.22251 | -0.79974 |
| C | 3.48477  | -1.68557 | -1.41369 |
| C | 4.70111  | -1.04536 | 0.27191  |
| N | 3.44415  | -1.32592 | -0.07300 |
| H | 2.58672  | -1.93386 | -1.95427 |
| H | 5.02921  | -0.62322 | 1.20749  |
| C | -6.59677 | 1.93327  | 1.26791  |
| O | -5.35810 | 2.14012  | 1.05802  |
| O | -7.31721 | 0.95869  | 0.85491  |
| O | -4.07885 | -2.19487 | -0.77154 |
| O | -6.01558 | -1.15838 | 0.48618  |

|   |          |          |          |
|---|----------|----------|----------|
| H | -4.07076 | -1.89935 | -1.70324 |
| H | -6.43076 | -1.77717 | 1.16200  |
| H | -6.56819 | -0.24442 | 0.50282  |
| H | -4.89214 | -1.74648 | -0.33786 |
| H | 4.63524  | 1.90317  | 0.66123  |
| H | -7.10060 | 2.70106  | 1.86574  |
| H | -1.58285 | 1.65764  | 3.76497  |
| H | -0.10734 | -3.79563 | 2.90660  |
| H | 3.65283  | 0.36929  | 5.67192  |
| H | 0.37542  | 4.90472  | 2.80316  |
| H | 0.86777  | -2.64184 | -4.03658 |
| H | -4.62505 | 0.56927  | -2.54722 |
| H | 1.86924  | 2.92386  | -5.88972 |
| H | 5.20942  | -1.85077 | -2.83579 |
| H | 3.29778  | 2.43378  | 4.19455  |
| H | 0.92081  | 6.42791  | 0.79141  |
| H | 3.85263  | 2.03260  | -4.54940 |
| H | -4.60362 | 1.83697  | -0.30844 |
| H | 6.56344  | -1.04710 | -0.83637 |
| H | 0.55208  | -5.83553 | -0.59706 |
| H | -0.60523 | -4.70368 | -3.63218 |
| H | -4.08378 | 1.49723  | 3.22531  |
| H | -0.31762 | -0.40919 | -0.00893 |
| H | 3.28247  | 1.77393  | -0.12131 |
| O | 5.57853  | 1.30101  | 1.95302  |
| H | 6.49600  | 1.70967  | 1.97420  |
| H | 5.13230  | 1.51593  | 2.82560  |

NI<sub>3e</sub>,3H (FR)

|    |          |          |          |
|----|----------|----------|----------|
| Cu | 2.15531  | 1.67087  | -1.30187 |
| Cu | 0.08391  | -1.93322 | 1.15020  |
| Cu | -2.16065 | 1.65571  | 0.17322  |
| O  | 1.61669  | -0.90434 | 0.11376  |
| O  | 4.00033  | -2.21904 | 0.15055  |
| C  | -2.07086 | -0.67378 | -3.13443 |
| N  | -3.43490 | -0.55878 | -2.89021 |
| C  | -1.45770 | 0.19482  | -2.26519 |
| C  | -3.61123 | 0.35048  | -1.89156 |
| N  | -2.42582 | 0.82523  | -1.48877 |
| H  | -0.40860 | 0.41043  | -2.13900 |
| H  | -4.56712 | 0.65008  | -1.47552 |
| C  | 0.38702  | 4.15470  | -1.65289 |
| N  | 1.37925  | 3.41408  | -1.02987 |
| C  | 0.00659  | 5.20504  | -0.87703 |
| C  | 1.60729  | 4.02832  | 0.13040  |
| N  | 0.79340  | 5.10184  | 0.24732  |

|   |          |          |          |
|---|----------|----------|----------|
| H | -0.72097 | 5.98433  | -1.02821 |
| H | 2.33469  | 3.74306  | 0.87048  |
| C | 3.19647  | -0.15485 | -4.67545 |
| N | 2.98695  | -1.32586 | -3.95834 |
| C | 2.77085  | 0.87215  | -3.88739 |
| C | 2.43231  | -0.96611 | -2.75500 |
| N | 2.29750  | 0.35950  | -2.68572 |
| H | 2.75431  | 1.92816  | -4.10855 |
| H | 2.15153  | -1.65677 | -1.98179 |
| C | 0.23632  | -4.48238 | -2.09462 |
| N | 0.49933  | -5.41333 | -1.10098 |
| C | 0.13013  | -3.27585 | -1.45078 |
| C | 0.54195  | -4.74883 | 0.09530  |
| N | 0.32575  | -3.45121 | -0.08690 |
| H | -0.09620 | -2.30644 | -1.85987 |
| H | 0.72012  | -5.23187 | 1.04541  |
| C | 0.18788  | 2.43331  | 3.42798  |
| N | -0.54941 | 3.60641  | 3.31636  |
| C | -0.19501 | 1.64620  | 2.36812  |
| C | -1.35373 | 3.49110  | 2.21595  |
| N | -1.15597 | 2.31622  | 1.61692  |
| H | 0.12816  | 0.64889  | 2.10967  |
| H | -2.05272 | 4.24887  | 1.89407  |
| C | -3.83982 | -0.97595 | 2.02957  |
| N | -3.91916 | -1.62343 | 0.81694  |
| C | -2.50276 | -0.92925 | 2.35283  |
| C | -2.66076 | -1.93881 | 0.43116  |
| N | -1.77460 | -1.53307 | 1.33829  |
| H | -2.01815 | -0.50920 | 3.21947  |
| H | -2.42857 | -2.43384 | -0.49776 |
| C | 1.57690  | -2.90558 | 4.77824  |
| N | 2.70102  | -2.41551 | 4.13477  |
| C | 0.51371  | -2.54221 | 3.99336  |
| C | 2.29749  | -1.78256 | 2.99928  |
| N | 0.97665  | -1.85392 | 2.88193  |
| H | -0.53834 | -2.73068 | 4.14035  |
| H | 2.97207  | -1.32412 | 2.29621  |
| C | 4.77172  | 1.34379  | 2.01519  |
| N | 5.53165  | 0.95320  | 0.92440  |
| C | 3.51942  | 1.60143  | 1.51698  |
| C | 4.73924  | 0.97789  | -0.18206 |
| N | 3.51046  | 1.37508  | 0.14359  |
| H | 2.62757  | 1.89499  | 2.04514  |
| H | 5.05978  | 0.60038  | -1.14025 |
| C | -6.71057 | -1.63276 | -1.41170 |
| O | -5.48203 | -1.92239 | -1.22138 |

|   |          |          |          |
|---|----------|----------|----------|
| O | -7.37092 | -0.64104 | -0.94076 |
| O | -4.04889 | 2.32183  | 0.83513  |
| O | -6.01615 | 1.40574  | -0.43293 |
| H | -4.15712 | 2.17498  | 1.79616  |
| H | -6.41303 | 2.08104  | -1.04752 |
| H | -6.59047 | 0.50137  | -0.51809 |
| H | -4.89108 | 1.93207  | 0.38953  |
| H | 4.56790  | -1.97072 | -0.64052 |
| H | -7.25334 | -2.32325 | -2.06851 |
| H | -1.68593 | -1.36143 | -3.86316 |
| H | -0.00659 | 3.95331  | -2.60432 |
| H | 3.60897  | -0.14405 | -5.64899 |
| H | 0.13839  | -4.74384 | -3.13174 |
| H | 0.87378  | 2.26199  | 4.24071  |
| H | -4.72837 | -0.61552 | 2.49830  |
| H | 1.64587  | -3.45826 | 5.68846  |
| H | 5.18997  | 1.39080  | 3.00411  |
| H | 3.16391  | -2.29479 | -4.32728 |
| H | 0.60995  | -6.42904 | -1.23371 |
| H | 3.67178  | -2.55052 | 4.42502  |
| H | -4.74016 | -1.71713 | 0.17334  |
| H | 6.52601  | 0.68186  | 0.95734  |
| H | 0.70638  | 5.70651  | 1.04116  |
| H | -0.51539 | 4.40375  | 3.98097  |
| H | -4.18260 | -1.14301 | -3.32407 |
| H | 1.79549  | 0.01288  | -0.17230 |
| H | 3.78408  | -3.16904 | 0.05612  |
| O | 5.47004  | -1.42338 | -1.86545 |
| H | 6.43846  | -1.69377 | -1.87032 |
| H | 5.11294  | -1.57801 | -2.78837 |
| H | 2.50935  | -1.34775 | 0.14545  |

NI3e,3H (innerwater)

|    |          |          |          |
|----|----------|----------|----------|
| Cu | 2.91908  | -1.43411 | 1.12023  |
| Cu | -0.86106 | 2.43365  | -0.82702 |
| Cu | -1.37912 | -2.01418 | -0.53253 |
| O  | -1.10854 | 0.28847  | -0.29946 |
| O  | 1.41790  | 0.77673  | -0.05373 |
| C  | -1.85903 | -0.71662 | 3.23251  |
| N  | -3.14794 | -1.11556 | 2.90364  |
| C  | -1.04182 | -1.25517 | 2.26743  |
| C  | -3.08349 | -1.86134 | 1.76032  |
| N  | -1.81452 | -1.96031 | 1.34077  |
| H  | 0.03110  | -1.19427 | 2.17709  |
| H  | -3.93867 | -2.27774 | 1.23687  |
| C  | 1.79036  | -4.22703 | 0.77776  |

|   |          |          |          |
|---|----------|----------|----------|
| N | 2.64180  | -3.19367 | 0.42493  |
| C | 1.62906  | -5.09651 | -0.25479 |
| C | 3.00634  | -3.44337 | -0.83319 |
| N | 2.40796  | -4.57653 | -1.26353 |
| H | 1.04910  | -5.99845 | -0.35168 |
| H | 3.68249  | -2.85414 | -1.42931 |
| C | 3.37068  | -0.11623 | 4.81338  |
| N | 2.86830  | 1.08996  | 4.35893  |
| C | 3.25443  | -1.00912 | 3.79267  |
| C | 2.47586  | 0.90032  | 3.05862  |
| N | 2.69459  | -0.37004 | 2.69385  |
| H | 3.51259  | -2.05677 | 3.78327  |
| H | 2.13591  | 1.70244  | 2.42350  |
| C | -0.76460 | 3.75690  | 3.12308  |
| N | -0.78314 | 4.93118  | 2.38710  |
| C | -0.71002 | 2.74679  | 2.19266  |
| C | -0.75040 | 4.61014  | 1.06275  |
| N | -0.69961 | 3.28729  | 0.91370  |
| H | -0.68379 | 1.68179  | 2.35263  |
| H | -0.78072 | 5.33753  | 0.26365  |
| C | 1.04027  | -1.47130 | -3.79902 |
| N | 0.64679  | -2.79125 | -3.98049 |
| C | 0.50341  | -1.07992 | -2.59780 |
| C | -0.11217 | -3.14985 | -2.89597 |
| N | -0.21048 | -2.13596 | -2.03593 |
| H | 0.58106  | -0.12238 | -2.11329 |
| H | -0.56649 | -4.12113 | -2.77098 |
| C | -4.03456 | 0.74228  | -1.96419 |
| N | -4.22156 | 0.99371  | -0.61532 |
| C | -3.17426 | 1.70519  | -2.42664 |
| C | -3.48373 | 2.09581  | -0.31008 |
| N | -2.80674 | 2.54218  | -1.38017 |
| H | -2.78138 | 1.83902  | -3.42298 |
| H | -3.44891 | 2.53598  | 0.67575  |
| C | 0.92998  | 4.29087  | -3.79799 |
| N | 2.13007  | 3.95555  | -3.19658 |
| C | -0.05304 | 3.61571  | -3.14386 |
| C | 1.82578  | 3.07206  | -2.18475 |
| N | 0.50905  | 2.85989  | -2.12861 |
| H | -1.11380 | 3.62369  | -3.33266 |
| H | 2.55579  | 2.63293  | -1.53012 |
| C | 5.19852  | 0.40555  | -1.96755 |
| N | 5.85638  | 0.71219  | -0.78673 |
| C | 4.09456  | -0.31896 | -1.58928 |
| C | 5.15982  | 0.17313  | 0.24890  |
| N | 4.08315  | -0.45998 | -0.20534 |

|   |          |          |          |
|---|----------|----------|----------|
| H | 3.30027  | -0.71601 | -2.19931 |
| H | 5.45484  | 0.26209  | 1.28536  |
| C | -6.61274 | -0.60342 | 1.53260  |
| O | -5.46044 | -0.04950 | 1.47791  |
| O | -7.04050 | -1.58502 | 0.82926  |
| O | -3.10856 | -2.71167 | -1.50218 |
| O | -5.17192 | -2.97739 | -0.10555 |
| H | -3.29622 | -2.32543 | -2.38061 |
| H | -5.37185 | -3.91424 | 0.16323  |
| H | -5.98674 | -2.34356 | 0.19344  |
| H | -4.00642 | -2.79843 | -1.00580 |
| H | 1.76887  | 1.64763  | 0.29103  |
| H | -7.31471 | -0.19506 | 2.27979  |
| H | -1.66278 | -0.06537 | 4.06429  |
| H | 1.33512  | -4.32599 | 1.71657  |
| H | 3.79345  | -0.24421 | 5.76948  |
| H | -0.80408 | 3.74875  | 4.20017  |
| H | 1.63324  | -0.93799 | -4.52224 |
| H | -4.50076 | -0.09222 | -2.43419 |
| H | 0.85122  | 4.96067  | -4.60376 |
| H | 5.58734  | 0.71492  | -2.92477 |
| H | 2.77717  | 1.96147  | 4.94895  |
| H | -0.82115 | 5.88690  | 2.75402  |
| H | 3.06428  | 4.34434  | -3.48749 |
| H | -4.76448 | 0.40306  | 0.07641  |
| H | 6.72124  | 1.25592  | -0.71155 |
| H | 2.42738  | -4.94736 | -2.19388 |
| H | 0.86050  | -3.36710 | -4.81694 |
| H | -4.02196 | -0.79446 | 3.37581  |
| H | -0.14548 | 0.32463  | -0.03430 |
| O | 2.35827  | 2.98359  | 0.91837  |
| H | 3.29276  | 3.33110  | 0.80343  |
| H | 1.72142  | 3.75241  | 0.86245  |
| H | -1.62146 | 0.29502  | 0.53227  |
| H | 2.04296  | 0.09707  | 0.26260  |

NI3e,3H (innerwater partial optimization)

|    |          |          |          |
|----|----------|----------|----------|
| Cu | 2.69153  | -1.68529 | 0.98936  |
| Cu | -0.80552 | 2.43527  | -0.96833 |
| Cu | -1.73550 | -1.91607 | -0.38571 |
| O  | -0.10908 | 0.53454  | -0.04634 |
| O  | 3.47142  | 2.55901  | 0.31526  |
| C  | -1.85622 | -0.38001 | 3.31772  |
| N  | -3.19550 | -0.66396 | 3.08474  |
| C  | -1.15575 | -1.04824 | 2.34200  |
| C  | -3.27386 | -1.47170 | 1.98523  |

|   |          |          |          |
|---|----------|----------|----------|
| N | -2.04853 | -1.71991 | 1.50248  |
| H | -0.08951 | -1.10052 | 2.18889  |
| H | -4.19587 | -1.82691 | 1.53528  |
| C | 1.27731  | -4.36454 | 0.87409  |
| N | 2.20226  | -3.44221 | 0.41471  |
| C | 0.96940  | -5.26661 | -0.09526 |
| C | 2.46333  | -3.79335 | -0.84491 |
| N | 1.73227  | -4.88163 | -1.17434 |
| H | 0.29951  | -6.10944 | -0.10687 |
| H | 3.15605  | -3.30745 | -1.51107 |
| C | 3.49375  | -0.22660 | 4.56830  |
| N | 3.08447  | 0.99840  | 4.07260  |
| C | 3.22905  | -1.15584 | 3.60963  |
| C | 2.59687  | 0.78099  | 2.80942  |
| N | 2.66817  | -0.52248 | 2.50803  |
| H | 3.38285  | -2.22320 | 3.64727  |
| H | 2.29849  | 1.57842  | 2.14794  |
| C | -0.33991 | 3.94857  | 2.88610  |
| N | -0.28881 | 5.07829  | 2.08480  |
| C | -0.44084 | 2.89044  | 2.01481  |
| C | -0.36833 | 4.68618  | 0.78175  |
| N | -0.45583 | 3.35893  | 0.70780  |
| H | -0.50877 | 1.83814  | 2.23514  |
| H | -0.37631 | 5.36976  | -0.05566 |
| C | 0.52154  | -1.79256 | -3.80750 |
| N | -0.00899 | -3.07392 | -3.88930 |
| C | 0.09961  | -1.28632 | -2.60334 |
| C | -0.73172 | -3.29659 | -2.74523 |
| N | -0.67815 | -2.23401 | -1.94189 |
| H | 0.29958  | -0.31724 | -2.18077 |
| H | -1.27003 | -4.20924 | -2.53860 |
| C | -4.19212 | 1.01435  | -1.82682 |
| N | -4.27113 | 1.35412  | -0.48670 |
| C | -3.27192 | 1.86001  | -2.39184 |
| C | -3.41221 | 2.39090  | -0.28787 |
| N | -2.76148 | 2.70978  | -1.41814 |
| H | -2.92936 | 1.90087  | -3.41455 |
| H | -3.27461 | 2.87671  | 0.66705  |
| C | 0.97340  | 3.94342  | -4.13767 |
| N | 2.16955  | 3.52116  | -3.58513 |
| C | -0.02900 | 3.40610  | -3.39164 |
| C | 1.84288  | 2.72742  | -2.50793 |
| N | 0.51765  | 2.65216  | -2.36660 |
| H | -1.09347 | 3.51086  | -3.52147 |
| H | 2.56515  | 2.25220  | -1.87007 |
| C | 4.94676  | -0.24988 | -2.32244 |

|   |          |          |          |
|---|----------|----------|----------|
| N | 5.70216  | 0.05083  | -1.19989 |
| C | 3.80260  | -0.83861 | -1.84178 |
| C | 5.02088  | -0.36000 | -0.09747 |
| N | 3.86195  | -0.90458 | -0.45347 |
| H | 2.93769  | -1.18531 | -2.38253 |
| H | 5.38570  | -0.24677 | 0.91409  |
| C | -6.67107 | 0.12137  | 1.88031  |
| O | -5.47578 | 0.55280  | 1.72948  |
| O | -7.23451 | -0.84791 | 1.26044  |
| O | -3.58057 | -2.48608 | -1.21548 |
| O | -5.57096 | -2.46868 | 0.30657  |
| H | -3.78292 | -2.12978 | -2.10325 |
| H | -5.84445 | -3.36516 | 0.64040  |
| H | -6.30041 | -1.74116 | 0.61267  |
| H | -4.45066 | -2.45570 | -0.66585 |
| H | 3.34119  | 3.52539  | 0.37765  |
| H | -7.28303 | 0.63715  | 2.64009  |
| H | -1.54710 | 0.29113  | 4.09779  |
| H | 0.87269  | -4.36751 | 1.84089  |
| H | 3.95955  | -0.34589 | 5.50534  |
| H | -0.31423 | 4.00126  | 3.96235  |
| H | 1.11843  | -1.36055 | -4.59247 |
| H | -4.76520 | 0.20740  | -2.22059 |
| H | 0.91126  | 4.57432  | -4.97565 |
| H | 5.30476  | -0.03216 | -3.31621 |
| H | 3.11484  | 1.90452  | 4.61473  |
| H | -0.21108 | 6.05100  | 2.39669  |
| H | 3.11769  | 3.79806  | -3.94964 |
| H | -4.82580 | 0.85844  | 0.26747  |
| H | 6.61884  | 0.50793  | -1.20474 |
| H | 1.65870  | -5.30109 | -2.08104 |
| H | 0.09619  | -3.71167 | -4.70116 |
| H | -4.00366 | -0.23204 | 3.58504  |
| H | -0.59845 | -0.32551 | -0.06098 |
| O | 5.46828  | 1.87792  | 1.93330  |
| H | 6.29250  | 2.45223  | 1.96551  |
| H | 5.16446  | 1.75641  | 2.88006  |
| H | 0.83487  | 0.29873  | 0.10413  |
| H | 4.24198  | 2.34694  | 0.91275  |

Proton PES

|    |          |          |          |
|----|----------|----------|----------|
| NI |          |          |          |
| Cu | 1.32805  | 1.03875  | -0.92415 |
| Cu | 0.29449  | -1.01851 | 1.04779  |
| Cu | -2.02171 | 1.25936  | -0.09632 |



|   |          |          |          |
|---|----------|----------|----------|
| O | -0.30195 | 0.43804  | -0.13282 |
| O | 2.00382  | -0.51089 | 0.20245  |
| C | -2.12926 | -1.36690 | -3.00506 |
| N | -3.47358 | -1.36136 | -2.65769 |
| C | -1.59262 | -0.23048 | -2.48573 |
| C | -3.71150 | -0.24882 | -1.92186 |
| N | -2.57715 | 0.45453  | -1.79196 |
| H | -0.57410 | 0.10519  | -2.50343 |
| H | -4.66562 | 0.01905  | -1.48420 |
| C | -0.18021 | 3.71324  | -2.41333 |
| N | 0.58854  | 3.02924  | -1.46563 |
| C | -0.46039 | 4.97664  | -1.98469 |
| C | 0.76476  | 3.90549  | -0.47543 |
| N | 0.14472  | 5.08234  | -0.75445 |
| H | -1.00623 | 5.77897  | -2.45210 |
| H | 1.29595  | 3.73193  | 0.44131  |
| C | 3.02350  | -0.70770 | -4.69873 |
| N | 2.94410  | -1.74842 | -3.78021 |
| C | 2.51459  | 0.39469  | -4.04713 |
| C | 2.41832  | -1.25090 | -2.62644 |
| N | 2.13620  | 0.04523  | -2.75408 |
| H | 2.39801  | 1.40187  | -4.41678 |
| H | 2.26753  | -1.83625 | -1.73764 |
| C | 0.58145  | -4.69381 | -1.18826 |
| N | 0.97454  | -5.34079 | -0.02489 |
| C | 0.32186  | -3.39603 | -0.84314 |
| C | 0.94290  | -4.39809 | 0.98111  |
| N | 0.55330  | -3.21464 | 0.50864  |
| H | -0.02068 | -2.58903 | -1.47068 |
| H | 1.19820  | -4.61120 | 2.00930  |
| C | -0.07771 | 3.16459  | 2.91994  |
| N | -0.91938 | 4.20388  | 2.56236  |
| C | -0.43595 | 2.09582  | 2.16199  |
| C | -1.76249 | 3.73637  | 1.59590  |
| N | -1.47187 | 2.46449  | 1.33379  |
| H | -0.01915 | 1.11023  | 2.14211  |
| H | -2.53616 | 4.31931  | 1.11739  |
| C | -3.68342 | -0.83008 | 2.33947  |
| N | -3.71368 | -1.69052 | 1.26076  |
| C | -2.35040 | -0.60724 | 2.61396  |
| C | -2.43614 | -1.95966 | 0.90134  |
| N | -1.57778 | -1.31400 | 1.69775  |
| H | -1.90256 | -0.00031 | 3.38452  |
| H | -2.16758 | -2.59208 | 0.06983  |
| C | 1.94782  | -1.68037 | 5.12390  |
| N | 3.02682  | -1.29514 | 4.34046  |

|   |          |          |          |
|---|----------|----------|----------|
| C | 0.86278  | -1.64552 | 4.26942  |
| C | 2.58827  | -1.06710 | 3.07810  |
| N | 1.27472  | -1.25415 | 2.99558  |
| H | -0.16983 | -1.88172 | 4.47395  |
| H | 3.27111  | -0.83540 | 2.27664  |
| C | 4.62706  | 2.26951  | 1.46918  |
| N | 5.38167  | 1.78270  | 0.41497  |
| C | 3.33409  | 2.31003  | 1.02424  |
| C | 4.52211  | 1.55139  | -0.63072 |
| N | 3.27340  | 1.86740  | -0.29080 |
| H | 2.45705  | 2.61633  | 1.57041  |
| H | 4.82896  | 1.15748  | -1.58864 |
| C | -6.53480 | -2.46926 | -0.77125 |
| O | -5.29835 | -2.65756 | -0.51586 |
| O | -7.23094 | -1.41870 | -0.53355 |
| O | -3.90580 | 1.82062  | 0.36062  |
| O | -6.02573 | 0.75809  | -0.35011 |
| H | -3.93635 | 1.96375  | 1.32877  |
| H | -6.54114 | 1.35662  | -0.95653 |
| H | -6.52804 | -0.20722 | -0.30636 |
| H | -4.80561 | 1.33070  | 0.10340  |
| H | 2.52602  | -0.00361 | 0.85184  |
| H | -7.04900 | -3.31034 | -1.25989 |
| H | -1.65591 | -2.19862 | -3.45660 |
| H | -0.51181 | 3.39909  | -3.36988 |
| H | 3.43942  | -0.86282 | -5.68345 |
| H | 0.52872  | -5.16511 | -2.14066 |
| H | 0.70158  | 3.24018  | 3.62987  |
| H | -4.60832 | -0.46510 | 2.75269  |
| H | 2.10082  | -1.95904 | 6.16392  |
| H | 5.05477  | 2.55889  | 2.40392  |
| H | 3.25197  | -2.72976 | -3.93724 |
| H | 1.21763  | -6.37064 | 0.03549  |
| H | 3.99044  | -1.13641 | 4.65510  |
| H | -4.55951 | -2.01551 | 0.70066  |
| H | 6.40893  | 1.57941  | 0.48466  |
| H | 0.10014  | 5.92267  | -0.18716 |
| H | -0.90935 | 5.13759  | 3.00598  |
| H | -4.14826 | -2.11841 | -2.86213 |
| O | 5.19128  | -2.71304 | -1.68172 |
| H | 3.85566  | -1.41768 | -0.09843 |
| C | 5.61228  | -2.15830 | -0.67149 |
| O | 4.83450  | -1.44072 | 0.20122  |
| H | 6.67008  | -2.15862 | -0.33782 |

TS

|    |          |          |          |
|----|----------|----------|----------|
| Cu | 1.42715  | 1.06292  | -0.96182 |
| Cu | 0.33908  | -1.10424 | 0.99920  |
| Cu | -1.92338 | 1.26504  | -0.08536 |
| O  | -0.14464 | 0.43461  | -0.11417 |
| O  | 2.29779  | -0.70386 | 0.21407  |
| C  | -2.19368 | -1.30307 | -3.00218 |
| N  | -3.53258 | -1.27286 | -2.64404 |
| C  | -1.61101 | -0.20530 | -2.45893 |
| C  | -3.72666 | -0.17355 | -1.87389 |
| N  | -2.56565 | 0.48755  | -1.73820 |
| H  | -0.58127 | 0.09628  | -2.48105 |
| H  | -4.66833 | 0.11432  | -1.42148 |
| C  | -0.16584 | 3.75230  | -2.35544 |
| N  | 0.63706  | 3.06537  | -1.43734 |
| C  | -0.45257 | 5.00478  | -1.89965 |
| C  | 0.82673  | 3.92944  | -0.44004 |
| N  | 0.18397  | 5.09968  | -0.68480 |
| H  | -1.01941 | 5.80718  | -2.34137 |
| H  | 1.39367  | 3.75795  | 0.45528  |
| C  | 2.95784  | -0.68983 | -4.70392 |
| N  | 2.86235  | -1.74561 | -3.80609 |
| C  | 2.47445  | 0.40773  | -4.02625 |
| C  | 2.36088  | -1.26936 | -2.63952 |
| N  | 2.10015  | 0.03366  | -2.73724 |
| H  | 2.37356  | 1.42529  | -4.37125 |
| H  | 2.22642  | -1.87766 | -1.76475 |
| C  | 0.45719  | -4.68508 | -1.24401 |
| N  | 0.84597  | -5.34753 | -0.08872 |
| C  | 0.21976  | -3.38718 | -0.89162 |
| C  | 0.83906  | -4.41243 | 0.92376  |
| N  | 0.46410  | -3.21969 | 0.45891  |
| H  | -0.11104 | -2.57169 | -1.51393 |
| H  | 1.10181  | -4.63280 | 1.94842  |
| C  | -0.04504 | 3.13951  | 2.95340  |
| N  | -0.87515 | 4.18981  | 2.60714  |
| C  | -0.37436 | 2.09062  | 2.16029  |
| C  | -1.69005 | 3.74662  | 1.60373  |
| N  | -1.38407 | 2.48272  | 1.31502  |
| H  | 0.04382  | 1.10515  | 2.12891  |
| H  | -2.45339 | 4.33795  | 1.11939  |
| C  | -3.72579 | -0.77380 | 2.32696  |
| N  | -3.77286 | -1.61557 | 1.23233  |
| C  | -2.38301 | -0.55048 | 2.57468  |
| C  | -2.50113 | -1.87432 | 0.84153  |
| N  | -1.62208 | -1.23868 | 1.62656  |
| H  | -1.91916 | 0.04090  | 3.34807  |

|   |          |          |          |
|---|----------|----------|----------|
| H | -2.25145 | -2.50122 | -0.00026 |
| C | 1.88160  | -1.78526 | 5.10315  |
| N | 2.97236  | -1.41066 | 4.33409  |
| C | 0.81041  | -1.73481 | 4.23000  |
| C | 2.56570  | -1.17670 | 3.06918  |
| N | 1.25011  | -1.34721 | 2.96203  |
| H | -0.22878 | -1.95682 | 4.41636  |
| H | 3.26993  | -0.96713 | 2.28226  |
| C | 4.62134  | 2.18571  | 1.49547  |
| N | 5.37039  | 1.70715  | 0.43410  |
| C | 3.33165  | 2.24996  | 1.04551  |
| C | 4.52037  | 1.49877  | -0.61816 |
| N | 3.27443  | 1.83109  | -0.28075 |
| H | 2.45543  | 2.56156  | 1.59003  |
| H | 4.82487  | 1.10098  | -1.57517 |
| C | -6.60651 | -2.36837 | -0.77299 |
| O | -5.38804 | -2.62174 | -0.48661 |
| O | -7.25420 | -1.28669 | -0.53975 |
| O | -3.81124 | 1.85056  | 0.39870  |
| O | -5.98433 | 0.84641  | -0.25733 |
| H | -3.82127 | 1.98233  | 1.36904  |
| H | -6.49320 | 1.48120  | -0.83249 |
| H | -6.51072 | -0.10638 | -0.25509 |
| H | -4.72383 | 1.37797  | 0.16388  |
| H | 2.56756  | -0.02157 | 0.85622  |
| H | -7.14771 | -3.17863 | -1.28585 |
| H | -1.74016 | -2.12259 | -3.47449 |
| H | -0.50786 | 3.45474  | -3.31421 |
| H | 3.37315  | -0.83741 | -5.68988 |
| H | 0.39887  | -5.14051 | -2.20130 |
| H | 0.71052  | 3.18276  | 3.68119  |
| H | -4.65809 | -0.42632 | 2.76133  |
| H | 2.03039  | -2.07141 | 6.14347  |
| H | 5.05109  | 2.44952  | 2.44054  |
| H | 3.15821  | -2.72445 | -3.96862 |
| H | 1.07106  | -6.38586 | -0.04241 |
| H | 3.93110  | -1.25846 | 4.64335  |
| H | -4.63597 | -1.94962 | 0.68863  |
| H | 6.38754  | 1.47470  | 0.50655  |
| H | 0.14727  | 5.92541  | -0.09874 |
| H | -0.87098 | 5.11352  | 3.08490  |
| H | -4.23029 | -2.01112 | -2.87575 |
| O | 5.04079  | -2.67203 | -1.68028 |
| H | 3.58473  | -1.23516 | 0.06741  |
| C | 5.47033  | -2.15230 | -0.64095 |
| O | 4.72025  | -1.43739 | 0.23269  |

|   |         |          |          |
|---|---------|----------|----------|
| H | 6.58883 | -2.25560 | -0.36633 |
|---|---------|----------|----------|

NI<sup>H</sup>(T3W)

|    |          |          |          |
|----|----------|----------|----------|
| Cu | 1.39806  | 1.14229  | -1.10019 |
| Cu | 0.29262  | -1.28627 | 0.97907  |
| Cu | -1.83127 | 1.31428  | 0.00216  |
| O  | -0.02034 | 0.43288  | -0.11417 |
| O  | 2.23867  | -1.31894 | 0.22433  |
| C  | -2.23834 | -1.03076 | -3.07490 |
| N  | -3.57073 | -0.98817 | -2.70567 |
| C  | -1.61325 | -0.00485 | -2.45080 |
| C  | -3.72201 | 0.05013  | -1.84393 |
| N  | -2.53623 | 0.65615  | -1.66551 |
| H  | -0.57299 | 0.25524  | -2.46480 |
| H  | -4.64973 | 0.33353  | -1.35930 |
| C  | -0.05905 | 3.97335  | -2.10162 |
| N  | 0.88443  | 3.27839  | -1.35446 |
| C  | -0.40225 | 5.14183  | -1.49124 |
| C  | 1.12092  | 4.04876  | -0.29292 |
| N  | 0.35438  | 5.17165  | -0.34226 |
| H  | -1.07569 | 5.93059  | -1.78207 |
| H  | 1.81649  | 3.83822  | 0.50064  |
| C  | 2.93737  | -0.40287 | -4.74127 |
| N  | 2.79456  | -1.52023 | -3.92177 |
| C  | 2.50234  | 0.66470  | -3.98995 |
| C  | 2.31162  | -1.11215 | -2.72403 |
| N  | 2.10666  | 0.21017  | -2.73007 |
| H  | 2.44611  | 1.70820  | -4.25915 |
| H  | 2.14778  | -1.75781 | -1.87938 |
| C  | 0.28939  | -4.59561 | -1.57764 |
| N  | 0.65285  | -5.35541 | -0.47485 |
| C  | 0.02704  | -3.33777 | -1.11459 |
| C  | 0.60344  | -4.52172 | 0.61880  |
| N  | 0.22514  | -3.29708 | 0.25409  |
| H  | -0.28719 | -2.46920 | -1.66957 |
| H  | 0.84462  | -4.83204 | 1.62556  |
| C  | 0.06676  | 2.94124  | 3.13985  |
| N  | -0.74834 | 4.02644  | 2.88138  |
| C  | -0.22894 | 1.98677  | 2.22557  |
| C  | -1.52851 | 3.69847  | 1.80831  |
| N  | -1.21100 | 2.47107  | 1.39602  |
| H  | 0.18288  | 1.00300  | 2.11485  |
| H  | -2.27801 | 4.33872  | 1.36704  |
| C  | -3.75075 | -0.83080 | 2.26929  |
| N  | -3.82255 | -1.58484 | 1.11417  |
| C  | -2.40185 | -0.65236 | 2.52278  |

|   |          |          |          |
|---|----------|----------|----------|
| C | -2.56275 | -1.84435 | 0.69526  |
| N | -1.66508 | -1.28880 | 1.52009  |
| H | -1.91639 | -0.13233 | 3.33377  |
| H | -2.33441 | -2.42415 | -0.18474 |
| C | 1.82089  | -2.16247 | 4.97382  |
| N | 2.90403  | -1.69431 | 4.24220  |
| C | 0.73341  | -1.99862 | 4.14140  |
| C | 2.46769  | -1.28415 | 3.03045  |
| N | 1.15061  | -1.45059 | 2.92801  |
| H | -0.30257 | -2.23958 | 4.32247  |
| H | 3.13039  | -0.94097 | 2.25661  |
| C | 4.63367  | 1.88721  | 1.66756  |
| N | 5.36778  | 1.42190  | 0.58326  |
| C | 3.32625  | 1.89916  | 1.25841  |
| C | 4.49946  | 1.16702  | -0.44023 |
| N | 3.24464  | 1.44626  | -0.05960 |
| H | 2.44962  | 2.18053  | 1.81727  |
| H | 4.78939  | 0.65529  | -1.34755 |
| C | -6.66609 | -2.14827 | -0.91874 |
| O | -5.47336 | -2.49126 | -0.61687 |
| O | -7.25659 | -1.04664 | -0.63203 |
| O | -3.69503 | 1.87982  | 0.57981  |
| O | -5.90618 | 0.98659  | -0.10946 |
| H | -3.68631 | 1.95917  | 1.55595  |
| H | -6.40392 | 1.70254  | -0.59253 |
| H | -6.46963 | 0.05796  | -0.21364 |
| H | -4.62245 | 1.44042  | 0.33288  |
| H | 2.50657  | -0.38753 | 0.11054  |
| H | -7.23729 | -2.89079 | -1.49892 |
| H | -1.80603 | -1.81201 | -3.61658 |
| H | -0.43427 | 3.70591  | -3.04952 |
| H | 3.33674  | -0.49544 | -5.74347 |
| H | 0.25738  | -4.96784 | -2.57365 |
| H | 0.78031  | 2.88986  | 3.90409  |
| H | -4.67750 | -0.50659 | 2.73381  |
| H | 1.96923  | -2.56243 | 5.97018  |
| H | 5.10047  | 2.14168  | 2.60275  |
| H | 3.07554  | -2.49774 | -4.16484 |
| H | 0.89907  | -6.38505 | -0.51371 |
| H | 3.88914  | -1.68904 | 4.52962  |
| H | -4.69450 | -1.87365 | 0.55485  |
| H | 6.41113  | 1.27875  | 0.59927  |
| H | 0.28423  | 5.91616  | 0.33729  |
| H | -0.75259 | 4.89808  | 3.45498  |
| H | -4.29228 | -1.68276 | -3.00542 |
| O | 5.23559  | -1.33455 | -1.75560 |

|     |          |          |          |
|-----|----------|----------|----------|
| H   | 3.20239  | -1.81998 | 0.21880  |
| C   | 5.46018  | -1.98982 | -0.69708 |
| O   | 4.60916  | -2.25732 | 0.25659  |
| H   | 6.51829  | -2.38113 | -0.54587 |
| TS' |          |          |          |
| Cu  | 1.65691  | 1.33887  | -1.01920 |
| Cu  | 0.04480  | -1.87268 | 1.12038  |
| Cu  | -1.60862 | 1.52977  | -0.00775 |
| O   | 0.11704  | 0.61137  | -0.26829 |
| O   | 1.71651  | -1.39021 | 0.17404  |
| C   | -2.28381 | -0.50877 | -3.23852 |
| N   | -3.61013 | -0.41502 | -2.85232 |
| C   | -1.58935 | 0.42460  | -2.54699 |
| C   | -3.68349 | 0.56056  | -1.90552 |
| N   | -2.45876 | 1.07580  | -1.69604 |
| H   | -0.53253 | 0.61287  | -2.53840 |
| H   | -4.58319 | 0.85119  | -1.37543 |
| C   | 0.28726  | 4.19592  | -1.68400 |
| N   | 1.28651  | 3.44643  | -1.08117 |
| C   | -0.05255 | 5.26678  | -0.91411 |
| C   | 1.56467  | 4.08160  | 0.05489  |
| N   | 0.76891  | 5.17432  | 0.18626  |
| H   | -0.76176 | 6.06341  | -1.06448 |
| H   | 2.30714  | 3.79277  | 0.77969  |
| C   | 2.99544  | -0.13812 | -4.71990 |
| N   | 2.75604  | -1.31567 | -4.02090 |
| C   | 2.67237  | 0.88211  | -3.86109 |
| C   | 2.32211  | -0.98603 | -2.77799 |
| N   | 2.24542  | 0.34222  | -2.65088 |
| H   | 2.71889  | 1.94821  | -4.02242 |
| H   | 2.08376  | -1.70368 | -2.01268 |
| C   | -0.08771 | -4.43852 | -2.06331 |
| N   | 0.17160  | -5.35288 | -1.05372 |
| C   | -0.30684 | -3.23806 | -1.45263 |
| C   | 0.10060  | -4.68947 | 0.13505  |
| N   | -0.18922 | -3.40786 | -0.08668 |
| H   | -0.52796 | -2.27791 | -1.88955 |
| H   | 0.26424  | -5.14631 | 1.10110  |
| C   | 0.25014  | 2.57919  | 3.39495  |
| N   | -0.48786 | 3.74245  | 3.26430  |
| C   | -0.03236 | 1.80531  | 2.31487  |
| C   | -1.20890 | 3.63940  | 2.10820  |
| N   | -0.92898 | 2.47855  | 1.51843  |
| H   | 0.33783  | 0.83276  | 2.05057  |
| H   | -1.89447 | 4.38665  | 1.73738  |

|   |          |          |          |
|---|----------|----------|----------|
| C | -3.89019 | -0.86690 | 2.16131  |
| N | -3.99462 | -1.47448 | 0.92565  |
| C | -2.55848 | -0.94428 | 2.51780  |
| C | -2.77112 | -1.90575 | 0.55988  |
| N | -1.86383 | -1.59561 | 1.49898  |
| H | -2.05705 | -0.58563 | 3.40307  |
| H | -2.57373 | -2.42540 | -0.36295 |
| C | 1.53296  | -2.78776 | 4.77291  |
| N | 2.64872  | -2.32421 | 4.09213  |
| C | 0.45242  | -2.40857 | 4.02118  |
| C | 2.23950  | -1.69777 | 2.96619  |
| N | 0.90583  | -1.73376 | 2.89169  |
| H | -0.59781 | -2.58282 | 4.19634  |
| H | 2.91394  | -1.29731 | 2.22636  |
| C | 4.71751  | 1.37131  | 1.89763  |
| N | 5.43536  | 0.94191  | 0.79057  |
| C | 3.44677  | 1.61197  | 1.44236  |
| C | 4.59739  | 0.91327  | -0.28610 |
| N | 3.38191  | 1.32846  | 0.07727  |
| H | 2.58664  | 1.95040  | 1.99449  |
| H | 4.87025  | 0.44185  | -1.22420 |
| C | -6.80642 | -1.55121 | -1.21852 |
| O | -5.65286 | -2.02884 | -0.94508 |
| O | -7.29717 | -0.43942 | -0.81105 |
| O | -3.45482 | 2.00184  | 0.75539  |
| O | -5.76260 | 1.36393  | 0.03288  |
| H | -3.40830 | 1.94823  | 1.73131  |
| H | -6.21058 | 2.19098  | -0.29839 |
| H | -6.39951 | 0.52423  | -0.22272 |
| H | -4.40634 | 1.65838  | 0.48765  |
| H | 1.41625  | -0.46351 | -0.05213 |
| H | -7.43347 | -2.17033 | -1.88515 |
| H | -1.89693 | -1.28890 | -3.81284 |
| H | -0.12680 | 4.01456  | -2.63370 |
| H | 3.37004  | -0.14866 | -5.72705 |
| H | -0.09619 | -4.68741 | -3.09694 |
| H | 0.88910  | 2.36408  | 4.20287  |
| H | -4.78431 | -0.45873 | 2.60983  |
| H | 1.62616  | -3.35383 | 5.67638  |
| H | 5.16531  | 1.43176  | 2.87551  |
| H | 2.92925  | -2.28338 | -4.37863 |
| H | 0.39770  | -6.36310 | -1.19644 |
| H | 3.63355  | -2.48014 | 4.36066  |
| H | -4.86178 | -1.57794 | 0.29502  |
| H | 6.44600  | 0.69175  | 0.80461  |
| H | 0.68992  | 5.78581  | 0.98123  |



|   |          |          |          |
|---|----------|----------|----------|
| H | -0.48013 | 4.52040  | 3.95803  |
| H | -4.37782 | -1.03621 | -3.21870 |
| O | 5.40118  | -1.39631 | -1.89309 |
| H | 2.70810  | -1.60972 | 0.06323  |
| C | 5.35536  | -2.17090 | -0.88597 |
| O | 4.38383  | -2.28553 | -0.03001 |
| H | 6.30060  | -2.82084 | -0.73061 |

NI<sup>H</sup>

|    |          |          |          |
|----|----------|----------|----------|
| Cu | 1.52945  | 0.95672  | -0.81868 |
| Cu | 0.33596  | -1.41256 | 1.13079  |
| Cu | -2.04714 | 1.45386  | -0.07380 |
| O  | -0.37599 | 0.43544  | -0.21192 |
| O  | 1.82232  | -0.75592 | 0.10970  |
| C  | -2.24104 | -1.03052 | -3.12474 |
| N  | -3.56373 | -1.03253 | -2.70747 |
| C  | -1.69008 | 0.11693  | -2.63083 |
| C  | -3.77006 | 0.05766  | -1.93144 |
| N  | -2.63761 | 0.77332  | -1.84273 |
| H  | -0.69503 | 0.50441  | -2.78210 |
| H  | -4.70246 | 0.30464  | -1.43338 |
| C  | -0.07397 | 3.86330  | -2.11263 |
| N  | 0.77784  | 3.12025  | -1.27969 |
| C  | -0.35151 | 5.07659  | -1.55497 |
| C  | 1.01112  | 3.92108  | -0.23904 |
| N  | 0.33914  | 5.09976  | -0.36628 |
| H  | -0.94066 | 5.90266  | -1.91745 |
| H  | 1.63935  | 3.69781  | 0.60371  |
| C  | 2.90624  | -0.46766 | -4.79489 |
| N  | 2.80674  | -1.57750 | -3.96285 |
| C  | 2.43338  | 0.58728  | -4.04443 |
| C  | 2.31888  | -1.17121 | -2.76468 |
| N  | 2.06416  | 0.13637  | -2.77816 |
| H  | 2.34314  | 1.62616  | -4.32177 |
| H  | 2.18969  | -1.81944 | -1.91572 |
| C  | 0.36100  | -4.62967 | -1.55567 |
| N  | 0.74104  | -5.37543 | -0.45015 |
| C  | 0.12609  | -3.36044 | -1.11258 |
| C  | 0.72894  | -4.52545 | 0.62884  |
| N  | 0.35945  | -3.30084 | 0.24849  |
| H  | -0.18279 | -2.50072 | -1.68366 |
| H  | 0.99002  | -4.81942 | 1.63560  |
| C  | 0.10410  | 2.91729  | 3.11108  |
| N  | -0.70994 | 4.01343  | 2.86741  |
| C  | -0.28051 | 1.95190  | 2.22595  |
| C  | -1.55757 | 3.68941  | 1.85092  |

|   |          |          |          |
|---|----------|----------|----------|
| N | -1.30666 | 2.44526  | 1.44073  |
| H | 0.10770  | 0.95818  | 2.10887  |
| H | -2.30994 | 4.34851  | 1.44158  |
| C | -3.67519 | -0.91093 | 2.33932  |
| N | -3.75918 | -1.70238 | 1.20750  |
| C | -2.32875 | -0.80308 | 2.62805  |
| C | -2.50304 | -2.05405 | 0.84259  |
| N | -1.60162 | -1.51869 | 1.67784  |
| H | -1.83978 | -0.27680 | 3.43287  |
| H | -2.28244 | -2.68399 | -0.00549 |
| C | 1.95644  | -2.11054 | 4.96572  |
| N | 3.02213  | -1.65202 | 4.20163  |
| C | 0.84452  | -1.93102 | 4.17504  |
| C | 2.55510  | -1.22645 | 3.00367  |
| N | 1.23115  | -1.37628 | 2.95647  |
| H | -0.18702 | -2.16526 | 4.38682  |
| H | 3.18769  | -0.87970 | 2.19995  |
| C | 4.72072  | 1.94394  | 1.57176  |
| N | 5.42834  | 1.46143  | 0.48409  |
| C | 3.41377  | 1.99829  | 1.19049  |
| C | 4.53515  | 1.21810  | -0.52487 |
| N | 3.30554  | 1.55551  | -0.12167 |
| H | 2.55712  | 2.29107  | 1.77427  |
| H | 4.80712  | 0.65121  | -1.41190 |
| C | -6.62285 | -2.16789 | -0.87382 |
| O | -5.36938 | -2.36743 | -0.72736 |
| O | -7.28633 | -1.13366 | -0.49864 |
| O | -3.85389 | 1.95961  | 0.52054  |
| O | -5.97868 | 0.96337  | -0.22129 |
| H | -3.84846 | 2.02977  | 1.49874  |
| H | -6.51173 | 1.63669  | -0.72690 |
| H | -6.53348 | 0.00645  | -0.21847 |
| H | -4.78102 | 1.48753  | 0.24890  |
| H | 2.74343  | -1.12719 | 0.09319  |
| H | -7.18699 | -2.96650 | -1.38695 |
| H | -1.79016 | -1.87928 | -3.58675 |
| H | -0.44005 | 3.65064  | -3.08864 |
| H | 3.31690  | -0.55588 | -5.79399 |
| H | 0.30349  | -5.01469 | -2.54264 |
| H | 0.87126  | 2.90496  | 3.85531  |
| H | -4.58371 | -0.53024 | 2.78926  |
| H | 2.11637  | -2.52198 | 5.95542  |
| H | 5.17767  | 2.16716  | 2.50333  |
| H | 3.08717  | -2.54516 | -4.19405 |
| H | 0.98010  | -6.40949 | -0.47862 |
| H | 4.01193  | -1.65189 | 4.48116  |

|   |          |          |          |
|---|----------|----------|----------|
| H | -4.62254 | -1.91717 | 0.62317  |
| H | 6.46607  | 1.29242  | 0.49046  |
| H | 0.31172  | 5.89578  | 0.26795  |
| H | -0.67805 | 4.90107  | 3.40841  |
| H | -4.26871 | -1.75720 | -2.94369 |
| O | 5.58142  | -1.12276 | -1.89353 |
| H | -0.60760 | -0.26493 | -0.85369 |
| C | 5.60855  | -1.78883 | -0.80576 |
| O | 4.68840  | -1.85453 | 0.09674  |
| H | 6.57753  | -2.37726 | -0.62269 |

NI<sup>e,H</sup>

|    |          |          |          |
|----|----------|----------|----------|
| Cu | 1.79264  | 1.50761  | -1.26867 |
| Cu | 0.21976  | -1.34412 | 1.09585  |
| Cu | -2.24115 | 1.26161  | 0.12800  |
| O  | -0.69424 | 0.18443  | 0.17232  |
| O  | 1.76878  | -0.58487 | 0.22169  |
| C  | -2.04320 | -0.98281 | -3.14737 |
| N  | -3.40681 | -0.97430 | -2.87068 |
| C  | -1.52458 | 0.08445  | -2.46917 |
| C  | -3.67333 | 0.05504  | -2.03622 |
| N  | -2.54442 | 0.71927  | -1.76209 |
| H  | -0.50165 | 0.41635  | -2.40277 |
| H  | -4.64790 | 0.29359  | -1.62854 |
| C  | 0.00247  | 3.97882  | -2.03491 |
| N  | 0.70109  | 3.16106  | -1.14319 |
| C  | -0.25241 | 5.19712  | -1.48200 |
| C  | 0.85419  | 3.90989  | -0.04902 |
| N  | 0.29405  | 5.13439  | -0.22195 |
| H  | -0.74789 | 6.06854  | -1.87551 |
| H  | 1.33122  | 3.61361  | 0.86554  |
| C  | 3.16492  | -0.29445 | -4.71308 |
| N  | 3.02922  | -1.40974 | -3.90008 |
| C  | 2.69533  | 0.76853  | -3.98748 |
| C  | 2.50101  | -0.99008 | -2.71176 |
| N  | 2.28005  | 0.32513  | -2.73688 |
| H  | 2.62483  | 1.80577  | -4.27599 |
| H  | 2.31114  | -1.63084 | -1.87110 |
| C  | 0.53390  | -4.55796 | -1.66803 |
| N  | 0.88036  | -5.33758 | -0.57378 |
| C  | 0.28119  | -3.30477 | -1.18419 |
| C  | 0.82829  | -4.52307 | 0.53238  |
| N  | 0.46954  | -3.28988 | 0.18534  |
| H  | -0.02799 | -2.42273 | -1.72022 |
| H  | 1.04727  | -4.85620 | 1.53688  |
| C  | -0.04574 | 2.82793  | 3.24446  |

|   |          |          |          |
|---|----------|----------|----------|
| N | -0.85772 | 3.92590  | 2.99500  |
| C | -0.48764 | 1.83465  | 2.42121  |
| C | -1.75886 | 3.57004  | 2.03525  |
| N | -1.54546 | 2.30809  | 1.66542  |
| H | -0.11789 | 0.83581  | 2.30799  |
| H | -2.51830 | 4.22493  | 1.63223  |
| C | -3.72065 | -1.06092 | 2.21750  |
| N | -3.75424 | -1.82663 | 1.06462  |
| C | -2.40984 | -1.05410 | 2.63760  |
| C | -2.49162 | -2.25618 | 0.81982  |
| N | -1.64658 | -1.80283 | 1.75067  |
| H | -1.97196 | -0.57120 | 3.49720  |
| H | -2.21657 | -2.85165 | -0.03681 |
| C | 1.85983  | -2.24679 | 4.95342  |
| N | 2.94838  | -1.77316 | 4.23625  |
| C | 0.78360  | -2.11893 | 4.10718  |
| C | 2.52159  | -1.39122 | 3.00667  |
| N | 1.20890  | -1.58013 | 2.89935  |
| H | -0.24874 | -2.38263 | 4.27388  |
| H | 3.19094  | -1.05072 | 2.23410  |
| C | 4.70519  | 2.00104  | 1.76238  |
| N | 5.48269  | 1.60419  | 0.68826  |
| C | 3.43342  | 2.13452  | 1.26930  |
| C | 4.66965  | 1.51283  | -0.40586 |
| N | 3.41956  | 1.83456  | -0.08743 |
| H | 2.54245  | 2.41204  | 1.80739  |
| H | 5.00694  | 1.20893  | -1.38627 |
| C | -6.55169 | -2.15182 | -1.18646 |
| O | -5.30233 | -2.29921 | -0.97246 |
| O | -7.28785 | -1.15623 | -0.84526 |
| O | -4.04990 | 1.92485  | 0.48754  |
| O | -6.07334 | 0.98237  | -0.52149 |
| H | -4.17179 | 2.01554  | 1.45605  |
| H | -6.54666 | 1.63631  | -1.10346 |
| H | -6.60341 | 0.01818  | -0.54572 |
| H | -4.94888 | 1.48646  | 0.09374  |
| H | 2.22426  | -0.00194 | 0.85491  |
| H | -7.04659 | -2.96701 | -1.73627 |
| H | -1.58388 | -1.77585 | -3.70767 |
| H | -0.30628 | 3.75082  | -3.01822 |
| H | 3.58715  | -0.35093 | -5.69101 |
| H | 0.50054  | -4.91908 | -2.66843 |
| H | 0.75783  | 2.83587  | 3.94759  |
| H | -4.62119 | -0.61778 | 2.59401  |
| H | 1.97792  | -2.63280 | 5.95164  |
| H | 5.11773  | 2.17106  | 2.73628  |

|   |          |          |          |
|---|----------|----------|----------|
| H | 3.31866  | -2.38316 | -4.15233 |
| H | 1.11477  | -6.36119 | -0.61743 |
| H | 3.91771  | -1.70817 | 4.57099  |
| H | -4.56747 | -1.94822 | 0.39314  |
| H | 6.48689  | 1.36048  | 0.75009  |
| H | 0.30072  | 5.91401  | 0.42016  |
| H | -0.79334 | 4.82936  | 3.49566  |
| H | -4.08531 | -1.69223 | -3.15314 |
| O | 4.92182  | -2.67983 | -1.77833 |
| H | 3.63565  | -1.50924 | -0.04341 |
| C | 5.36955  | -2.19511 | -0.74312 |
| O | 4.62338  | -1.56962 | 0.21589  |
| H | 6.43468  | -2.19110 | -0.45182 |
| H | 0.04983  | 0.57615  | -0.32570 |

NI<sup>2e,H</sup>

|    |          |          |          |
|----|----------|----------|----------|
| Cu | 1.94785  | 1.68490  | -1.33644 |
| Cu | 0.21257  | -1.52050 | 1.04384  |
| Cu | -2.06891 | 1.30236  | 0.15759  |
| O  | -0.47677 | 0.18587  | 0.14170  |
| O  | 2.03658  | -1.18225 | 0.17531  |
| C  | -2.12472 | -0.75856 | -3.18946 |
| N  | -3.47279 | -0.75095 | -2.85412 |
| C  | -1.55379 | 0.27139  | -2.50262 |
| C  | -3.67980 | 0.23933  | -1.95645 |
| N  | -2.52426 | 0.87520  | -1.70924 |
| H  | -0.52838 | 0.60372  | -2.50778 |
| H  | -4.63129 | 0.47486  | -1.49431 |
| C  | 0.08088  | 4.12325  | -1.83792 |
| N  | 1.02997  | 3.39496  | -1.12795 |
| C  | -0.29540 | 5.23208  | -1.14397 |
| C  | 1.23111  | 4.08243  | -0.00290 |
| N  | 0.44328  | 5.18326  | 0.01558  |
| H  | -0.98232 | 6.02681  | -1.38152 |
| H  | 1.92793  | 3.83145  | 0.77765  |
| C  | 3.04805  | -0.13741 | -4.73299 |
| N  | 2.89491  | -1.28691 | -3.97604 |
| C  | 2.57333  | 0.89171  | -3.96748 |
| C  | 2.36900  | -0.93060 | -2.77479 |
| N  | 2.14639  | 0.38831  | -2.73850 |
| H  | 2.50226  | 1.93985  | -4.21427 |
| H  | 2.21262  | -1.61253 | -1.96035 |
| C  | 0.32650  | -4.48744 | -1.86164 |
| N  | 0.65468  | -5.32836 | -0.80967 |
| C  | 0.05790  | -3.26877 | -1.31018 |
| C  | 0.57884  | -4.59072 | 0.34224  |

|   |          |          |          |
|---|----------|----------|----------|
| N | 0.21763  | -3.34262 | 0.06039  |
| H | -0.23523 | -2.35420 | -1.79854 |
| H | 0.78753  | -4.98117 | 1.32811  |
| C | 0.02793  | 2.70205  | 3.37015  |
| N | -0.76849 | 3.81812  | 3.17445  |
| C | -0.35412 | 1.77970  | 2.44774  |
| C | -1.61608 | 3.54108  | 2.14073  |
| N | -1.37184 | 2.31212  | 1.68166  |
| H | 0.02900  | 0.79272  | 2.28093  |
| H | -2.36171 | 4.22104  | 1.75454  |
| C | -3.77348 | -1.03218 | 2.18786  |
| N | -3.83379 | -1.74316 | 1.00236  |
| C | -2.44732 | -1.03112 | 2.56785  |
| C | -2.57952 | -2.15247 | 0.69726  |
| N | -1.70840 | -1.73619 | 1.62356  |
| H | -1.98484 | -0.59084 | 3.43738  |
| H | -2.33434 | -2.71753 | -0.18762 |
| C | 1.76545  | -2.49775 | 4.86625  |
| N | 2.86098  | -2.00026 | 4.17650  |
| C | 0.68882  | -2.28467 | 4.03978  |
| C | 2.44362  | -1.52034 | 2.98138  |
| N | 1.12494  | -1.67535 | 2.86816  |
| H | -0.34868 | -2.53522 | 4.19507  |
| H | 3.11604  | -1.14097 | 2.23071  |
| C | 4.69064  | 1.75100  | 1.87372  |
| N | 5.45355  | 1.36439  | 0.78302  |
| C | 3.40407  | 1.84379  | 1.40934  |
| C | 4.62646  | 1.22436  | -0.28696 |
| N | 3.37346  | 1.52799  | 0.05410  |
| H | 2.50765  | 2.09465  | 1.95241  |
| H | 4.95042  | 0.89903  | -1.26524 |
| C | -6.63669 | -1.94026 | -1.22682 |
| O | -5.39208 | -2.15227 | -1.03485 |
| O | -7.32290 | -0.93728 | -0.81072 |
| O | -3.88236 | 1.92211  | 0.62559  |
| O | -5.99681 | 1.10315  | -0.31583 |
| H | -3.95595 | 1.97682  | 1.60146  |
| H | -6.45838 | 1.82378  | -0.82515 |
| H | -6.57409 | 0.16862  | -0.41459 |
| H | -4.81166 | 1.52394  | 0.26402  |
| H | 2.15217  | -0.23795 | -0.05475 |
| H | -7.17283 | -2.69584 | -1.82383 |
| H | -1.68864 | -1.54361 | -3.75851 |
| H | -0.27358 | 3.90999  | -2.80644 |
| H | 3.50980  | -0.15023 | -5.69249 |
| H | 0.32107  | -4.78367 | -2.88243 |

|   |          |          |          |
|---|----------|----------|----------|
| H | 0.78958  | 2.63088  | 4.10205  |
| H | -4.67686 | -0.62045 | 2.60513  |
| H | 1.88106  | -2.95716 | 5.83235  |
| H | 5.12792  | 1.91989  | 2.84092  |
| H | 3.19590  | -2.24787 | -4.25331 |
| H | 0.90610  | -6.33862 | -0.90673 |
| H | 3.83865  | -2.01401 | 4.48991  |
| H | -4.66280 | -1.84281 | 0.34175  |
| H | 6.47077  | 1.17364  | 0.81194  |
| H | 0.39718  | 5.88769  | 0.73073  |
| H | -0.71359 | 4.68126  | 3.75432  |
| H | -4.18555 | -1.42610 | -3.18978 |
| O | 4.78008  | -2.48970 | -1.90321 |
| H | 3.06806  | -1.56536 | 0.17611  |
| C | 5.20450  | -2.21557 | -0.75501 |
| O | 4.48306  | -1.80916 | 0.26980  |
| H | 6.32712  | -2.31252 | -0.56124 |
| H | 0.09928  | 0.41850  | -0.61606 |
